# Supplementary material for: Frequency and quality of first aid offered by older adolescents: a cluster randomised crossover trial of school-based first aid courses
Source: PeerJ. 2020 Aug 17;8:e9782. doi: 10.7717/peerj.9782 (PMC7439956; doi:10.7717/peerj.9782)
Supplement: Supplemental Information 2 [file peerj-08-9782-s002.xlsx]

## Sheet: Sheet2
PID	Random code for blinded coding	Whatyoudid	Physical first aid provided (code as allocated from codebook)	Additional codes if multiple valid physical first aid actions given (code as allocated from codebook)	1 - DRSABCD	2 - Danger	3 - Response	4 - Send for help	5 - Airways	6 - Breathing	7 - CPR	8 - Defibrillator	9 - Strains and sprains	10 - Fractures & Dislocations	11 - Wound care	12 - Shock	13 - Concussion	14 - Asthma	15 - Diabetes	16 - Allergies	17 - Anaphylaxis	18 - Poisons	19 - Exposure to heat	20 - Exposure to cold	21 - Seizures	22 - Spinal Injury	23 - Fainting	No code allocated - reponse is not adequate or effective first aid	No code allocated - nonsensical answer	No code - didn't require help	No code allocated - didn't meet anyone that required first aid	Appropriate first aid provided (0=no, 1=yes, blank=n/a)	Allocation to tMHFA (1) or PFA (0) intervention
410	1	.																											1
1518	2	Comfort him/her																										1				0
925	3	Do something fun with the person.																										1				0
1064	4	I reported her to the printable																										1				0
1328	5	I spoke to one person about their problems, as for the other one I just helped him walk to the staff area																										1				0
918	6	It was during school hours, so I went to go get a teacher, while my other friends stayed with him.																										1				0
715	7	Talk to them to see if their ok and yea just help them																										1				0
1218	8	talk to them. i																										1				0
150	9	invite him come to my house																										1				0
90	10	talk to them about what the problem is, spend time with them to help get there minds off it.																										1				0
1192	11	Get bandages and antiseptic to help her	11												1																	1	1
1338	12	i took there mind off on what was happening so they wont worry as much. i sometimes asked them what happened and if i could do anything																										1				0
655	13	They only had a small cut so I gave them a band aid.	11												1																	1	0
1031	14	Helped keep them calm until medical assistance arrived																										1				0
275	15	gave them help and made them feel more confident with themselves																										1				0
92	16	During a soccer game I collided with 2 players after the collision we were all on the ground. I helped one of the boys up and attempted to help the second one up. An ambulance was called for the boy who couldn't get up.	4					1																								1	1
612	17	Reassured them, arm in a sling	10											1																		1	0
81	18	I let them know that I would always listen to what they had to say and wouldn't say or judge what they had to say																										1				0
1511	19	Stayed with them and continued to ask them if they needed help																										1				0
372	20	call 000	4					1																								1	1
901	21	Tried to help her calm down																										1				0
982	22	Did the first to he																											1
213	23	make sure they were alright to stand up then took them to the first aid staff																										1				0
1205	24	try to talk to them with sometime, when they feel better																										1				0
1484	25	i didnt??																													1
328	26	I helped them by moving them off the netball court and providing them with ankle strapping and ice	9	2		1							1																			1	1
603	27	told them to stay off their foot as they had hurt their ankle, told them to elevate it and ice it	9										1																			1	0
959	28	Couldn't, they were in qld																													1
39	29	I would use a first aid kit																										1				0
1488	30	I gave an ice pack for a sore ankle																										1				0
1462	31	no one needed first aid																													1
1449	32	None - no one needed first aid																													1
118	33	Try to help in any way I could. If I could could not solve the problem by myself, I would call someone who is more qualified.																										1				0
492	34	called an ambulance	4					1																								1	0
572	35	I don't remember																											1
1094	36	Wrapped a bandage around the split on their head and went to the hospital with them to get stitches	11												1																	1	0
131	37	Helped apply a sling, water	10											1																		1	0
397	38	I asked them if they were okay and then I helped them up and took them to first aid																										1				0
1476	39	Ask if needed.																										1				0
917	40	band aids	11												1																	1	0
7	41	Carried him home																										1				0
688	42	call for help and keep them calm	4					1																								1	1
103	43	I told the doctor to come on the field																										1				0
660	44	help the old people cross the road.																										1				0
710	45	i havent come into contact with someone																													1
1215	46	I told them to talk to someone that know more about this then me but you can still talk to me if you want or need.																										1				0
507	47	nothing																											1
1163	48	I've forgotten but if I ever see a person struggling, I usually always ask them if they're alright or need a hand. eg. take them to the sickbay																										1				0
230	49	Called ambulance, put a bandage over wound	4	11				1							1																	1	0
1308	50	if they needed help holding things																										1				0
478	51	I bandaged wounds and helped treat a victim of a car crash involving drunk driving, the person was 16 and a passenger. I provided basic first aid until emergency services arrived	11												1																	1	0
1586	52	offer assistance, and if he needed anything																										1				0
678	53	I don't know!!!!																											1
303	54	she had told me what happened and I just told her that if she needed to talk to me I am always here and I told her how much of a good friend she was and how much I loved her to make her feel better																										1				0
845	55	gave them a straw with a milkshake and tell them to suck it up princess.																											1
879	56	Got ice, got help																										1				0
1372	57	i asked if he was alright and he said yes so i was unsure what to do																										1				0
1012	58	administered an epicene, asthma medicine, bandaid	16	14														1		1												1	0
329	59	I called for a medic	4					1																								1	1
223	60	got an adultg																										1				0
1091	61	made sure they were comfortable and gave them support throughout their trauma																										1				0
401	62	I wasn't there																													1
494	63	Supported them when they were worried about having to receive first aid																										1				0
481	64	i can't remember																											1
1202	65	I dont know anyone who has been injured																													1
407	66	im not sure																											1
1392	67	help the person up																										1				0
773	68	nothing i wasnt there																													1
833	69	back problems / patriarchy																										1				0
59	70	I told them I was there for them if they needed anything :)																										1				0
542	71	Asked if he was okay, told someone to get the school nurse and comforted him																										1				0
32	72	visited them and bought them stuff to make them feel better																										1				0
674	73	sports injury																											1
898	74	Got one of the first aid people to come and help																										1				0
47	75	the person suffered a blow to the head which gave him a knock out. He fell flat on the ground, then i tilted him onto his right side and tried to keep his head still.	13														1															1	1
1172	76	I couldn't do anything																										1				0
1095	77	offered her comfort and reassurance that everything will be ok																										1				0
1318	78	called a teacher over																										1				0
260	79	i was just there																										1				0
330	80	I sent someone to go get first aid and i helped them off the court and kept them calm																										1				0
1226	81	i helped them with like lifting things and helped them walk abit																										1				0
301	82	I told an adult then comforted them, offered support and did what first-aid I knew how to do for the situation.																										1				0
1489	83	Do whatever i can																										1				0
694	84	Helped my injured friend off the netball court																										1				0
1007	85	told people to stand back																										1				0
690	86	told the teacher at school																										1				0
28	87	THEY FELL OVER AND I HELPED THEM																										1				0
1633	88	helped someone when they scraped their knee																										1				0
444	89	I talked to them to try and keep them calm																										1				0
1460	90	I tried to comfort the person and understand their point of view																										1				0
601	91	Get first aid lady and keep them clam																										1				0
583	92	Offer to find medical help. Help them to their feet if safe. Talk to them about what they were experiencing.																										1				0
1414	93	?																											1
484	94	Didn't meat anyone																													1
197	95	Stay calm and keep still, rest your arm (it was a break)																										1				0
815	96	asked what had happened and try to assist helping them																										1				0
8	97	I try to be friend with him																										1				0
1296	98	i cant remember																											1
1333	99	I asked them what was wrong and tried to comfort them.																										1				0
365	100	Bandaged and put ice on a sprained ankle.	9										1																			1	1
161	101	CALLED THE emergency	4					1																								1	0
748	102	called ambulance	4					1																								1	1
606	103	helped them get to a first aid nurse. kept them calm by talking with them																										1				0
1114	104	give some advices																										1				0
565	105	It was not severe, they only required a bandaid for a cut ...	11												1																	1	0
492	106	ask if they needed an ambulance																										1				0
283	107	I wrapped the injury to stop it from bleeding	11												1																	1	1
1050	108	Helped calm them down and disinfect the massive wound	11												1																	1	0
1346	109	Walked her to the nurse.																										1				0
1463	110	There was no person																													1
244	111	I helped them to a safer place	2			1																										1	1
491	112	Stuff																											1
1088	113	Got an ice pack and fixed his bike and helped him to the car to drive him home	9										1																			1	0
1638	114	dont																											1
794	115	Help to recover her wound.																										1				0
551	116	I ask if they needed me to do anything for them and wanted me to stay and support them.																										1				0
1550	117	I help them up and offered them suppport.																										1				0
1311	118	I asked if they were okay and if they needed any help.																										1				0
568	119	Nothing																											1
541	120	just stick around																										1				0
551	121	i called for help and reassured the person that everything was going to be okay																										1				0
644	122	I offered any assistance and to help out in any way																										1				0
1514	123	Helped bring them to the nurse.																										1				0
408	124	ask if they were alright. got first aid. stuff like that.																										1				0
178	125	ask if they were okay																										1				0
1607	126	Nothing																											1
395	127	If it was at my house I would of offered them a panadol and possibly bandages ect.																										1				0
1569	128	I asked if they were, alright and needed any help. If they did asking what I can do to help.																										1				0
1461	129	I took her/him to the sick bay and watched over her/him to make sure they were okay.																										1				0
865	130	offered support and guidance, a listening ear and a shoulder to cry on. Encouraged them to see poeple and more																										1				0
734	131	Ask them if they were okay then tell an adult																										1				0
1540	132	cpr	7								1																					1	0
609	133	call the ambulance for assistance	4					1																								1	0
322	134	Be there for them when they need someone																										1				0
853	135	I talked to her. That's it. I didn't ask questions, I just chatted to her.																										1				0
1225	136	I recommended that they talk to someone and to have their injury checked out.																										1				0
792	137	.																											1
993	138	Got some ice																										1				0
1581	139	talk to them																										1				0
388	140	i didnt healp anyone																													1
221	141	i picked up there bike and dusted them off. they were in a bad way but refused anymore help other than calling his parents to pick him up																										1				0
1433	142	I do not remember how I helped this person. I might have called for a nearby teacher.																										1				0
700	143	Tried to notify an adult																										1				0
983	144	Help																										1				0
53	145	I went to hospital to visit them																										1				0
1486	146	first called an ambulance then offered medical assistance	4					1																								1	0
300	147	It was during a netball game, so I helped them off the court and got an ice pack for them.																										1				0
1294	148	I helped them and just did what was needed to be done.																										1				0
1197	149	Talk to them and just listen to what they're going through																										1				0
1512	150	Ask if they were ok, call an adult,																										1				0
1014	151	Assist them by putting a bandaid on their womb.	11												1																	1	0
98	152	told them to see a health professional																										1				0
696	153	stayed with them and got them first aid from an adult																										1				0
555	154	After he had an epileptic fit i helped him to the ground and gave him head support afterwards	21																						1							1	0
154	155	TALK WITH THEM																										1				0
40	156	Got help + helped transport them.																										1				0
811	157	look at what was wrong and tried to fix the problem																										1				0
843	158	Give them a Band-Aid and tell them to suck it up	11												1																	1	1
1396	159	I sought after an adult or professional that could help them in the setting appropriate whilst keeping them calm and encouraging them through the circumstances (work manager, basketball coach etc.)																										1				0
443	160	I did not come into contact with anyone who needed first aid.																													1
1296	161	Suggest what they do, tell someone else and offer support																										1				0
1164	162	Made them lie down, got them water and called a ambulance.	4					1																								1	1
99	163	Called the ambulance and also got my boss	4					1																								1	1
1355	164	Help and cater for their needs.																										1				0
463	165	Help																										1				0
1531	166	I gave them a band aid and took them to the nurse	11												1																	1	0
729	167	I wasn't there at the time.																													1
1068	168	I offered to help and i had someone who had more qualified																										1				0
661	169	seisure, so I layed her on her side and opened her mouth and begun talking to her. covered her with a blanket. After I called a teacher.	21																						1							1	1
147	170	Assist them with their injury																										1				0
217	171	cover his bleeding head and asses it	11												1																	1	0
431	172	I haven't helped anyone before with injuries																													1
1580	173	Talked with them																										1				0
724	174	called the ambulance stayed at hospital vist the next day at his house	4					1																								1	1
1309	175	I told them i was here to listen to their problems, and that i would do anything in my power to help																										1				0
1553	176	Well she and I had almost drowned when we went out to the beach together and although she got rescued first and I got rescued five or so minutes later, she was more shaken up then I was. She was in a state of shock or something, so I snapped out of my shock and gave her a towel, got her to sit down and tried to bring her back to reality. Made her feel comfortable and everything.																										1				0
45	177	One person had a broken leg and I helped get people out their way when they were on crutches and couldn't get up the stairs at school. I also opened doors for them. I don't know if that counts :()																										1				0
381	178	Get parents and people who know the standard procedures of first aid to assist him																										1				0
621	179	.																											1
1004	180	Called 000	4					1																								1	0
1268	181	Calm them down and made sure they were in a stable enough condition for me to call the ambulance	4					1																								1	1
1408	182	I talked to them about their problem and attempted to help them																										1				0
343	183	I talked to her everyday on phone I visited her after she got out of hospital, I also before the incident I told the school consoler. I would hang out with her, let her talk to me about all her problems. I also introduced her to good bands/ singers that I thought would help her and make her happy again (the bands really helped).																										1				0
527	184	Call ambo	4					1																								1	0
53	185	Went over to their house to comfort																										1				0
1634	186	didnt have to help																												1
847	187	call help 000	4					1																								1	1
509	188	Took them to sick bay																										1				0
471	189	talk to them about it																										1				0
1353	190	i just told her to go see the nurse																										1				0
989	191	Support them through the use of RICER and DRSABCD	1	9	1								1																			1	0
1301	192	I don't know anyone who needed help																													1
1262	193	i dont know																											1
573	194	I applied a bandage on their foot to support it as they had sprained it																										1				0
1549	195	yes																											1
868	196	I had to inject an epipen into my friend, who was having an allergic reaction	17																		1											1	1
1179	197	Ask about their problems																										1				0
1620	198	Talk																										1				0
380	199	dunno																											1
1560	200	tall to them																										1				0
505	201	i haven't had to help anyone																													1
434	202	Located the pain area. Got a medical assistant to help. Then comforted them																										1				0
86	203	kept him company																										1				0
345	204	asked how i could help and if they were alright and needed first aid.																										1				0
1204	205	I haven't been in this particular situation																													1
248	206	The casualty had fallen off his dirt bike and suffered some broken bones (more than one) so I secured him safely and moved him off the dirt bike track to await an ambulance	2			1																										1	1
1004	207	I took them home and got their parents to call an ambulance.																										1				0
289	208	I helped the person to get medical assistance, and personally placed that person in the hands of certified medical practitioners.																										1				0
1169	209	I listened to them.																										1				0
518	210	tallk with him																										1				0
447	211	Talk																										1				0
419	212	not sure																											1
1306	213	i helped them deal with there problems and try to make sure they stopped self harming. They got some help and are all okay now																										1				0
713	214	Talked to them																										1				0
133	215	I gave him a asthma pump	14															1														1	0
1375	216	nothing																											1
316	217	I listened to anything she needed to tell me and reminded her that i was always there whenever she needed anything																										1				0
615	218	what ever the needed, I can't remember																										1				0
50	219	helped calm them down, got someone who could perform first aid																										1				0
1349	220	make an easy first aid that related to heart...																											1
919	221	Talk to them about their issue																										1				0
1525	222	I helped them and walked them to the nurse																										1				0
320	223	perform my methods																										1				0
1432	224	i would ask them if they need anything																										1				0
100	225	help him out whenever they needed help																										1				0
129	226	iuldf																											1
1225	227	They had cut them self by accident when shaving so I gave them a band-aid	11												1																	1	1
318	228	.																											1
1491	229	I will talk with him, and help him what he needs																										1				0
299	230	i comforted them																										1				0
1560	231	i talked to him and gave water																										1				0
1539	232	haven't perform first aid on any one before																													1
386	233	calm them down and get help																										1				0
1410	234	Talk to him very often																										1				0
104	235	I cant remember																											1
642	236	Stopped the bleeding by bandage and kept them from falling unconscious.	11												1																	1	0
1042	237	Called an ambulance and held her head up	4					1																								1	0
585	238	I did not come across any situation like this																													1
1544	239	Ask them if they need assistant or help with carrying their belongings or getting around																										1				0
410	240	offered to get them the help they needed from a professional in first aid																										1				0
383	241	Nothing noone got hurt																													1
542	242	I asked if they need assistance																										1				0
1628	243	hang out																										1				0
582	244	calm them down until an ambulance came, or helped in any way i could aka stop bleeding or make sure they didnt go to sleep, get them pain killers etc.																										1				0
108	245	nuthin																											1
1520	246	Run over to them and waited until someone who was able to help the situation came.																										1				0
651	247	Gave them a band aid and some betadine.	11												1																	1	0
347	248	I asked them if they were alright and brought them ice etc.																										1				0
1117	249	told them to sit down																										1				0
1310	250	Talk to them about the situation and make a comparison with something else similar so that they don't feel bad or that it isn't just happening to them only.																										1				0
1455	251	.																											1
1184	252	I notified the manager of the situation																										1				0
1524	253	Put a band-aid on them, assist them to the nurse.	11												1																	1	0
264	254	i helped by helping the person move so he could be treated.																										1				0
1250	255	I didn't have anyone to help																													1
72	256	There was no problem																													1
557	257	help them to walk around if they could not and try to get the weight/pressure off																										1				0
513	258	call and ambulance and helped them talk to someone and seek help	4					1																								1	0
1188	259	I offered my support any time																										1				0
156	260	talk																										1				0
503	261	0																											1
512	262	called an ambulance and tried talking them through it	4					1																								1	0
1128	263	iced sprained ankle																										1				0
992	264	not sure.																											1
831	265	bandage up their wound	11												1																	1	1
123	266	nothing																											1
1636	267	Didn't need to help anyone.																													1
528	268	had to go to the office to get their inhaler because they could feel an asthma attack coming on	14															1														1	0
1366	269	I help the person to the bathroom to wash off the blood from his knee.																										1				0
304	270	applied general first aid																										1				0
566	271	Broken arm - i																										1				0
309	272	suport																										1				0
1054	273	called the ambulance.	4					1																								1	0
561	274	try talk with him or play together																										1				0
195	275	don't know																											1
1018	276	I cleaned the graze and gave them a bandaid.	11												1																	1	0
675	277	got bitches																											1
504	278	Talked to them																										1				0
1001	279	Not sure																											1
1144	280	Ask them if they were okay, say that i would always be there for them whenever they needed me																										1				0
1205	281	Spend more with he/she and help reduce their sadness																										1				0
622	282	helped them by assisting them with their books																										1				0
910	283	Talk with him																										1				0
54	284	called help																										1				0
964	285	I went to the gym and there was a girl who fainted next to the equipment, I asked the traner in this gym to bring her to the coach, she laid down and I made some hot sugar tea for her to drink in order to increase the sugar level in blood.	23																								1					1	0
237	286	I haven't had to help anyone																													1
77	287	what??																											1
125	288	I haven't be in contact with someone in the last 12 months that needed help because of an injury																													1
1060	289	I asked them if the need help and I asked someone who knows about first aid to come and help them.																										1				0
234	290	I talked to them																										1				0
1598	291	Didn't do anything...																											1
1589	292	nothing because i don't think i come across with people who need																													1
562	293	I ensured that they were safe and went over basic fundamentals of conducting safety of the person during the injury or person.																										1				0
180	294	conversation with the person to ask if they needed any assistance																										1				0
89	295	I did not since I haven't experienced such a problem																													1
1589	296	Talk to them and help them																										1				0
81	297	Building a friendship																										1				0
535	298	I sat down with them, talked to them to try and help them. I dont know how i helped the others.																										1				0
265	299	search for help																										1				0
1460	300	talked to them about their problems																										1				0
458	301	Refer them to a medical professional and make an effort to comfort them in the meantime.																										1				0
1196	302	keeping myself and the people around me calm																										1				0
407	303	asked if she needed help to the first aid																										1				0
802	304	n/a																											1
602	305	put bandage on his wound	11												1																	1	0
657	306	He had become very anxious and I decided it was best if he went home. I took him home.																										1				0
622	307	Well my sister broke her arm at first I freaked out because her bone went through her skin because I didn't know what to do and I made her cry by accident. So then she went in an ambulance and she was high of the green tube and I tried communicating with her about something other than the accident and she was loopy and when she got a bed in the emergency room I offered to get her some water but I…																										1				0
409	308	I honestly don''t recall																											1
312	309	not sure																											1
924	310	generally make sure they're ok																										1				0
707	311	Provided support, ice, compression bandages	9										1																			1	1
886	312	There were adults around, so I tried to make her as comfortable as possible, got her ice and water, while the adults looked at the injury																										1				0
204	313	iced their foot, elevated it and put a bandage around it	9										1																			1	0
1606	314	Clean the wound, put antiseptic and cover the wound	11												1																	1	0
1144	315	not sure																											1
247	316	cold compresses and other things like pressure on wounds	11												1																	1	1
956	317	Talked to them, asked how they were																										1				0
95	318	anything they wated																										1				0
935	319	Give way																											1
1240	320	bandaging their wound, ice compress	9										1																			1	1
968	321	Talked to them and got professionals to help																										1				0
1180	322	i don't remember any time i was around someone when they were hurt enough to need first aid. i've asked friends if they're alright when seeing them after it happened																													1
1099	323	Calmed the person, offered advice and medical help. Simple wound cleaning and bandaging with alcohol and antiseptic	11												1																	1	0
277	324	I asked them if they were OK, if there was anything they needed, anything I could help with, I generally do my best to help people when I can																										1				0
1010	325	I did not help someone																													1
1029	326	i said that i would be around to help if they needed help																										1				0
1034	327	Talk to her, played with her.																										1				0
1194	328	idk																											1
226	329	Checked his injury, when I discovered it was serious, I called an ambulance and remained with him.	4					1																								1	0
993	330	Helped them up																										1				0
527	331	I did nothing.																											1
355	332	comforted them																										1				0
496	333	rang the ambulance and comforted them	4					1																								1	0
583	334	helping up stairs																										1				0
1469	335	talk																										1				0
1631	336	I listened to her and told her whats best for her. I told her to stay positive and seek help from someone like the school School Counsellor.																										1				0
595	337	i forgot																											1
669	338	Talk to me about it.																										1				0
417	339	patch up wounds																										1				0
206	340	idk																											1
273	341	Not sure																											1
531	342	I had to stop the bleeding of his arm with a handkerchief. I tied the handkerchief tightly to stop the wound from bleeding and to tell him to stay calmly. Then I had to assign someone to go to fetch a bandage wrap and alcohol. When I got the alcohol, I removed the handkerchief and clean the wound using the alcohol and bandage wrapped the wound	11												1																	1	0
1533	343	Helped cleaned the injury and put on a bandaid	11												1																	1	0
1086	344	Helped them to sit down																										1				0
1290	345	The person that i helped was a small child. She followed her dad across the road where she is supposed to stay with her mother and grandma. The daughter was crossing the road without any care or protection nor is the dad looking at her. I told the mother and the mother went and grabbed her. it was a situation that could have been worse																										1				0
1252	346	walked them over to the first aid office																										1				0
1529	347	Ask them whether they needed anything, asked whether they were in pain and helped them up.																										1				0
1224	348	clean their wound for them																										1				0
404	349	well i do st. john first aiding so i volunteer and and treat people for there injuries																										1				0
51	350	I called an adult and seeked help.																										1				0
540	351	I recently completed my full first aid certificate and had used it at the train station when a girl had passed out due to lack of air on the crowded train. I had helped the person using my first aid qualifications and elevated her legs and gave her some water to drink.	23																								1					1	0
1023	352	I parformed first aid on an injurd knee with a group																										1				0
325	353	seek professional help, support them																										1				0
381	354	Ask if they needed anything and assisted them however I could.																										1				0
1568	355	didn't have contact with anyone who was injured																													1
1085	356	iced their ankle after they sprained it																										1				0
706	357	Help then fix there hand																										1				0
976	358	Made a sling out of my T-shirt and carried him to a safe place	10											1																		1	0
1192	359	I stayed with them at the hospital and took care of them																										1				0
1089	360	dont remember																											1
712	361	nothing																											1
518	362	nothing																											1
1149	363	I ask him to play games with me																										1				0
470	364	nothing																											1
532	365	let them talk to me, give them advice, was there for them																										1				0
1116	366	Help them sit down on a chair to relieve the pain of their dislocated knee. Gave them an ice pack to place on their knee, until somebody could strap it.	10											1																		1	0
33	367	I would be there to help and support the person, whenever they needed me, because that's what friends are for..																										1				0
1501	368	i called ambulance and took care of him till they came by holding his arm in place as it was broken	4	10				1						1																		1	0
869	369	not sure																											1
235	370	I put a friend of mine in the fetal position after she passed out. I helped a woman off public transport after dislocating her knee.																										1				0
1577	371	Helped them get up from their awful bike fall until the parent came to take him to the hospital.																										1				0
367	372	spend more time talking and hanging out with her																										1				0
44	373	it depends whats their problem is and i would make them happy the best as i can. also i would ask them to hang out together																										1				0
1154	374	try to understand their problem from listen their story																										1				0
294	375	n/a																											1
1304	376	N/A																											1
1024	377	A person broke there leg in my Muay thai class and I helped by calling for help a helped carry them to a car																										1				0
1481	378	asked them if they were ok																										1				0
401	379	didnt need to because i dont know anyone with this issue																													1
1554	380	Ask what happened and did my best to help them.																										1				0
1587	381	Gave them all my support																										1				0
686	382	called the teacher																										1				0
199	383	Call 000	4					1																								1	0
1582	384	Visit them in the hospital and had a chat with them.																										1				0
582	385	stayed with them until the school nurse came, and supported her > she dislocated her knee																										1				0
176	386	Made sure they were ok																										1				0
892	387	got help of an adult																										1				0
1456	388	give them confidence and a friend																										1				0
521	389	I helped get the nurse																										1				0
526	390	Talk with them normally just like a normal person as I know that they don't like to feel different than others.																										1				0
1188	391	listened																										1				0
1081	392	Stayed with him to make sure eh was good																										1				0
772	393	n/a																											1
1148	394	Ask them what their problem is. Give them advises or go seek for help.																										1				0
48	395	Not sure																											1
358	396	i made sure they were okay and asked them if they needed anything to help them																										1				0
1339	397	this 13 year old boy tripped from his bike and he seemed to be really hurt so I ran all the way to my house to get first aid and therefore I helped him make him feel better.																										1				0
1284	398	Spoke to them and asked them to tell me what was wrong with them and if they wanted to talk about it																										1				0
127	399	Lay the person on there side after they had been Knocked out.	5						1																							1	0
653	400	I cant remember																											1
1469	401	talk to them																										1				0
1084	402	No idea																											1
26	403	Asked them what was wrong, then rang an ambulance.	4					1																								1	1
1370	404	With problems that are personal and involve social life.																										1				0
1593	405	getting her up when she fell																										1				0
1619	406	I helped person by walking/carrying her to the first aid room.																										1				0
1052	407	Got a person trained in first aid, made sure they were calm and feeling ok after they'd had attention																										1				0
229	408	laid them down or sat them somewhere they were comfortable , turned the person on their side so that they didn't vomit into their mouth and choke, gave them water to drink, tried to communicate/ talk with them so that they would stay awake	5						1																							1	0
625	409	Stopped the bleeding with a bandage	11												1																	1	0
1380	410	I gave them some of the first aid things in my room to prevent more injury from occurring.																										1				0
270	411	offered assistance and gave them a bandage	9										1																			1	1
293	412	gave them a hug																										1				0
356	413	tell them what they could do for themselves that help them or who they could talk to																										1				0
836	414	Nothing																											1
1553	415	They had a cut so I disinfected the wound and gave them a bandaid.	11												1																	1	0
16	416	cuz																											1
253	417	Find help or provide help																										1				0
1326	418	talk to them about the problem and offered my opinion on what they should do to help them																										1				0
636	419	I do not even remember anything like this happening.																											1
408	420	helped them																										1				0
1228	421	I have not met one.																													1
490	422	ask if i could do anything to help and let them know i am there for them																										1				0
91	423	I dunno																											1
1339	424	I helped him by giving first aid because we have a first aid kit in the car, and we took him to the nearest hospital.																										1				0
455	425	brought him to sick bay																										1				0
35	426	not in the position																											1
642	427	DRSABCD, Called an ambulance and reassured. Also did a splint and bandage.
575	428	i offer help and give it if required																										1				0
694	429	There was no one																													1
1543	430	help them relax and solve their problems																										1				0
1154	431	talking with that person																										1				0
550	432	Asked if they were okay and got the school nurse																										1				0
254	433	made sure they are okay, called for help.																										1				0
448	434	Got my friend an ice pack and held her hand whilst her pinky figure was put back in place																										1				0
983	435	Talk																										1				0
540	436	I helped them and supported them after they had tried to harm themselves																										1				0
1590	437	I used ice to try to relax him and then let him rest.	9										1																			1	0
1187	438	nothing																											1
937	439	Applying R.I.C.E to sprains, strains, torn ligaments, pulled muscles cleaning wounds Fixing blisters, cuts, DRSABCD	9	1	1								1																			1	0
580	440	I haven't needed to help anyone in an emergency																													1
1207	441	All about basic injuries that relates to gym and any weight lifting, sprained wrists, and other things such as bruised knuckles from boxing and sprained ankles.																										1				0
1388	442	help bandage the patients fractured wrist, dislocated elbow, blood nose, fever and more general illnesses	10											1																		1	1
1214	443	I helped carry him to the side of the soccer pitch to wait for other people to also come help who are more experienced than i am in these situations.																										1				0
1106	444	i didnt																													1
1415	445	I don't know																											1
592	446	Made sure he was okay and rested him up and iced his sore knee	9										1																			1	0
1277	447	i havent been in that situation recently so i am not too sure																													1
1031	448	call the ambulance and keep them stable and relaxed for the time being	4					1																								1	0
1579	449	buy him some medicine at the pharmacy when he need.																										1				0
57	450	I tried to get them to tell me their problems, so they were able to let everything out.																										1				0
121	451	comforted him and helped the doctors with his injury																										1				0
626	452	Talked them through it.																										1				0
849	453	helped them up and got help for them																										1				0
1320	454	I haven't came across anyone with help like this.																													1
964	455	They had asthma attack and I gave them inhealer follow the steps.	14															1														1	0
989	456	I have injured myself in recent times, and made sure I rested my injured body part. Whilst helping other people, I made sure I followed DRSABCD, but when injured, I tried to identify the problem, and tried to keep that part in the best position so it didn't get worse and caused the least pain, iced it, then waited for higher qualified people to arrive	1	9	1								1																			1	0
477	457	i dont know																											1
1168	458	not sure																											1
327	459	Helped them up if they were able to walk																										1				0
311	460	nothing																											1
243	461	(none)																											1
484	462	I suggested things for that person with the injury																										1				0
1354	463	i didnt know if anyone needed help																												1
948	464	not sure																											1
1384	465	talk to them																										1				0
1251	466	Talked about it to them in order to give them comfort.																										1				0
1203	467	talk to them and listen to their problem then we can help them out.																										1				0
1091	468	clean the wound and offered moral support																										1				0
1574	469	I gave advice to them so they could do something about it, but then I met them in person and helped them																										1				0
1071	470	Ask for help																										1				0
74	471	Well it was my nephew and he had a deep cut on his head, I first got a town and put water on it and told him to hold it against the wound, and as it was still bleeding and no one was home - I dialed 000 to ask for help and it went on from there.	11	4				1							1																	1	1
323	472	Made sure they were feeling okay and that they were comfortable																										1				0
603	473	I don't remember																											1
464	474	emotional support and distraction from pain with humour																										1				0
1244	475	saw if they were okay and took them to the nurse.																										1				0
1387	476	i will ask them, what is their problem																										1				0
346	477	i dont know																											1
1516	478	The person's wrist was hurting for them, so I told them to stop overusing the wrist to prevent the pain from becoming worse.																										1				0
1328	479	My friend had fallen and twisted her ankle when we were in her backyard. I helped her inside and wrapped up her ankle until later in the evening when she went to a doctor.																										1				0
306	480	i dont know																											1
769	481	Offered to help them Got other people to help me help them.																										1				0
451	482	she's a girl of my age and she strongly wanted to suicide her self and get rid of the problems,The problem was that her mother having a boy friend either than her father,her mom use to scold her alot and keep threatning her.Her mom uses to have drugs and do illegal work at home,and she's really disturbed once she tried to get poisoned her self in the school washroom I saw her at once and stopped …																										1				0
1075	483	Can't remember																											1
486	484	I aided the particular individual by placing the person in a recovery position	5						1																							1	0
950	485	he stacked playing tennis and spraied his wrist																										1				0
1065	486	I assisted them in sitting down somewhere safe and stopping the bleeding before an adult (my parents) arrived.																										1				0
22	487	Determine if they were okay and if not I																										1				0
1459	488	Take them to the schools first aid, ask teachers for some assisstance																										1				0
947	489	w																											1
1285	490	[no response provided]																											1
211	491	Got them water/ bandages	10											1																		1	0
286	492	I don't remeber																											1
688	493	pick him up off the ground and called someone over																										1				0
250	494	gave them pizza																											1
123	495	help him																										1				0
1080	496	N/A																											1
1468	497	nothing																											1
654	498	I talked to them, and tried acting as if I believed that they had a problem, so that way they would be more confident in talking to me about it and I could try and help them in some way, so that way they can get rid of their problems and try and work on making friendships and other relationships.																										1				0
1257	499	I got an adult to help.																										1				0
1341	500	i calmed him down and took him to his parents and told them what happened																										1				0
329	501	Just make them feel involved																										1				0
5	502	Instructed them what to do																										1				0
1175	503	Calm them down																										1				0
198	504	gave them CPR	7								1																					1	0
608	505	I didn't quite know what to do so I called an Adult that knew what they were doing because I didn't want to make it worse.																										1				0
500	506	=.=																											1
498	507	comforted then until ambulance arrived																										1				0
117	508	never said there was a person, person reading this fix the survey																													1
870	509	i told them that if they needed anything they could talk to me.																										1				0
736	510	.																											1
1382	511	I helped them to an adult or provided them with the help that they needed.																										1				0
535	512	I cleaned the cut and bandaged it	11												1																	1	0
1330	513	I got some frozen peas because their ankle was swelling up.																										1				0
1046	514	I asked if they were alright. and waited with them until the ambulance arrived																										1				0
969	515	Recovery position and call medical officer	4	5				1	1																							1	0
366	516	give them first aid																										1				0
47	517	I dont remember if i had to help anyone.																											1
1426	518	ask for help																										1				0
830	519	nothing																											1
1106	520	Ask them if they were all right																										1				0
1629	521	IM NOT SURE																											1
1636	522	I made sure that the injured person didn't move because they may have injured their neck or spine.	22																							1						1	0
1314	523	save their question																											1
951	524	Call the ambulance	4					1																								1	0
1293	525	I would take them to the nurse if it was at school.																										1				0
742	526	looked after them until they received medical first aid																										1				0
825	527	told someone																										1				0
1041	528	my sister had a seziure so i helped to her side and made sure she dinde swallow her tongue.	21																						1							1	0
1053	529	there literally wasn't a person this is peer pressure :-(																													1
1403	530	I helped talk her out of her situation and supported her.																										1				0
454	531	call the ambulance and try to help them	4					1																								1	0
313	532	im not sure																											1
479	533	Not sure																											1
1427	534	Close this person. Listen this person tell about the problem																										1				0
787	535	i got her an ice pack and strapped up her knee	9										1																			1	1
745	536	Gave them some vitamin d D for dick																											1
943	537	ask if they were ok ask if they needed anything got first aid professionals for them checked up on them after they had been looked after by doctors
58	538	1:called the ambulance -got to serious 2: comfort	4					1																								1	1
1253	539	i helped relax them and i helped hold the ice where they needed it and i helped them sit or lay in a comfortable position so that they weren't in a lot in pain	9										1																			1	1
962	540	I never come cross a situation wher i had to help them																													1
1199	541	Walk																											1
144	542	Laughed at his pain to make it go away, then sit him down and called the teacher over. Gave him a bandaid then yelled at him.																										1				0
649	543	Comforted them, and helped them to somewhere they could sit and rest after injuring their foot, while we waited for someone with an ice pack	9										1																			1	0
611	544	take her to the medical clinic at the snow																										1				0
1513	545	I guided them to proper medical care by leading them to the first aid, ensuring that nothing would interfere																										1				0
252	546	Help them find an adult or a full trained first aid person																										1				0
1625	547	He didnt know how to swim and went into the deeper part of the pool which was dangerous. I suddenly called the teacher that taught us and he got him out of the deeper part as the friend was drowning.																										1				0
873	548	Stayed with them whilst waiting for ambulance & keep in touch with the while they are out of school																										1				0
1065	549	I asked them to sit down. I alerted an adult to the situation and got the first aid kit. I helped her clean the wound and apply a band-aid (it bled a lot but was just a small cut)	11												1																	1	0
396	550	I visited them in the hospital and kept them company.																										1				0
737	551	I helped them be more comfortable and them found an adult who could help them better than i could																										1				0
493	552	listened for they talk about, get she some forward form personal point of view. We will talk what is key of the problem.																										1				0
1366	553	...																											1
1221	554	She tripped and hurt her ankle, so I let her lean on me as we walked to the nurses office. I put her arm around my shoulders and pretty much walked for the both of us, with her hopping.																										1				0
1314	555	Do my best																										1				0
684	556	Helped lifting him up into the van.																										1				0
913	557	ask if they needed me to get them something so they don't move and they can rest																										1				0
597	558	Calmed them down, called for help and comforted them with anything they needed																										1				0
43	559	ask a parent or adult in the vicinity to help																										1				0
988	560	helped them																										1				0
685	561	ok																											1
1394	562	I assisted them to the first aid office																										1				0
1358	563	I really didn't want to dive deep into their personal problems, what I do is I ask them if they would like to tell me their problems and then tell them I am here for them to talk to.																										1				0
961	564	Ark them that 'are you okay?' And make them feel confident.																										1				0
170	565	made sure their injury was well supported before getting medical help																										1				0
1107	566	He got hit in the face with a soccer ball took him in the office and we putted ice on it																										1				0
513	567	helped her when the situation occurred then proceeded to tell the persons parents																										1				0
272	568	I took them to first aid																										1				0
834	569	took them to the first aid office and notified a teacher and his older brother																										1				0
85	570	To help this person, I provided both emotional comfort and physical assistance.																										1				0
236	571	It was a hard situation I couldn't really help them cause I didn't know how or what the actual problem was. So instead I was just standing by them and waiting with them for help to come, not touching them encase it would hurt them further.																										1				0
310	572	I helped her to measure her blood sugar because her hand was too shaky																										1				0
1263	573	I haven't met a person around my age needing emergency or first aid assistance.																													1
264	574	dont understand																											1
142	575	The boy was doing the 400m relay & he fell & I went go help him and took him inside & provided him with a Bandage.	10											1																		1	0
439	576	N/A																											1
1261	577	nothing																											1
1412	578	talk with her and fix the problems																										1				0
467	579	there as nobody																													1
299	580	made sure they were ok																										1				0
992	581	Performed RICER	9										1																			1	0
333	582	I called the ambulance	4					1																								1	1
438	583	Not sure																											1
117	584	refer them to counter strike:global offensive																										1				0
336	585	get them an ice pack, offer to help carry them to first aid	9										1																			1	1
1142	586	I talked to them, made them to be my close friends and tried to find the way to solve the problems.																										1				0
519	587	Got them out of the danger	2			1																										1	0
1104	588	nothing																											1
1069	589	Ask them if they needed help and provided someone who knew what they were doing.																										1				0
1480	590	get them a band aid	11												1																	1	0
341	591	I don't know!																											1
314	592	talked to him and made them feel involved																										1				0
1243	593	told them how to manage their injury (things not to do)																										1				0
1235	594	I asked that person how she was feelings and i suggested that she should tell her parents before or go to the doctors. I also told her to find information about her injury online.																										1				0
99	595	no person																												1
115	596	i don't remember but if i were to see a person who required first aid now i would help them up if necessary and get them the help they need if i cant help them in any other way																										1				0
332	597	Gave him $5																										1				0
564	598	perform required treatment and support and contact anyone neccessary																										1				0
1344	599	help them became happy, no sad																										1				0
448	600	Collect an ice pack as well as elevating her ankle	9										1																			1	0
1002	601	F																											1
1019	602	Ask them																										1				0
30	603	call the parents																										1				0
214	604	Forgot																											1
1094	605	Gave a young girl who fell off her bike a band aid	11												1																	1	0
707	606	Talked to them.																										1				0
652	607	nothing because he broke his arm in a footy game and the physio helped him so there was nothing i could do																													1
336	608	got help																										1				0
1493	609	Talk with them if there any problem and listen to them,																										1				0
1054	610	tried to calm the person down called for help																										1				0
179	611	Called ambo	4					1																								1	0
564	612	found the first aid people for them and carried their gear																										1				0
529	613	Let them vent to me , gave them an idea of what to do instead. Went out with them to the shops																										1				0
1518	614	provide comforting words																										1				0
327	615	Offer to help them carry their stuff or open doors. Just basic everyday needs.																										1				0
1168	616	There was no one.																													1
778	617	I didn't need to help anyone as there was no one to help																													1
297	618	It was on a football field and i helped carry her off the ground in the proper way																										1				0
422	619	Comforted them with my soothing voice of a thousand sirens.																										1				0
1527	620	Seal a wound and apply anti -bacterial solution	1												1																	1	0
686	621	call someone to help comfort people																										1				0
230	622	called and ambulance comforted them	4					1																								1	0
458	623	I suggested that they seek medical help through the school sick bay																										1				0
1335	624	I helped calm them while help came																										1				0
803	625	Aided them until the ambulance came																										1				0
1392	626	I went went to the hospital together																										1				0
247	627	are																											1
1623	628	Held their leg																										1				0
860	629	Attended a counsellor's meeting with them. Lt them speak their problems to me.																										1				0
101	630	listening to them																										1				0
1452	631	nothing.																											1
615	632	i didnt																													1
1324	633	what them what wrong they are adn help them to fix that problem																										1				0
152	634	I comforted them, made sure they were okay and helped them in any way possible																										1				0
481	635	Told them to relax and stay still and had my other friend get help																										1				0
768	636	I asked if they were alright and simply helped them.																										1				0
1361	637	I offered them assistance in anything they needed and made sure I stayed with them.																										1				0
632	638	called for help																										1				0
776	639	I haven't been in a situation to help a person																													1
311	640	tell her what to do																										1				0
457	641	Gave them a Band-Aid for the cut.	11												1																	1	0
1258	642	I told them to go to the local doctors clinic																										1				0
868	643	Took them to first aid																										1				0
315	644	Help them get to someone who knows first aid.																										1				0
320	645	I spoke to htem lisened to their issues and prayed for them. didnt do anything after that other than ask how the were doing.																										1				0
261	646	told them its ok and they should go see someone to talk to																										1				0
1114	647	Talk to them																										1				0
1324	648	talk to them and try to help them																										1				0
1626	649	cut finger, so i put a band aid on it.	11												1																	1	0
1035	650	nothing																											1
711	651	I made sure that they were calm, and helped them, until the ambulance came																										1				0
347	652	I talked to her and listen to her problems																										1				0
321	653	got them an ice-pack and bandages.	9										1																			1	1
370	654	Nothing																											1
124	655	Let them talk to me about how they were feeling, and what was on their mind. Gave minor suggestions based on experience.																										1				0
533	656	i helped them get to the nurses office and stayed with them for a bit																										1				0
667	657	help them walk																										1				0
759	658	they were sport injuries, I only witnessed events but ambulances were called by parents																										1				0
499	659	My dad cracked his sternum playing rugby. First off I made sure he stopped playing, I applied ice to his chest and then I made sure he relaxed and wasn't freaking out. I then asked if he could drive, which he somehow could so then I went with him to the hospital.	10											1																		1	0
24	660	Applied pressure to the area.	11												1																	1	1
933	661	Call for help	4					1																								1	0
1610	662	seek for assistance																										1				0
1322	663	I asked the person if they're feeling okay and I will call the ambulance as soon as possible.	4					1																								1	1
1402	664	sat them down so they could settle down from the dizzyness they were having. i assessed what could have been a cause, and later made sure the person was well taken cared of (food water rest)																										1				0
313	665	gave them some antibacterial wash and some baindaids	11												1																	1	1
1235	666	I																											1
128	667	[no answer provided]																											1
162	668	not sure																											1
753	669	I helped them into a position to ease pressure off their leg while i went to find bandages, cotton pads for protection of the would and something to clean it with	11												1																	1	1
553	670	carry them and roll them out the way	2			1																										1	0
534	671	ask them how they are and try to help																										1				0
945	672	Take them to sick bay, made them feel better																										1				0
1615	673	buy something																										1				0
207	674	I did not see any injuries.																													1
309	675	CALLED SOMEONE																										1				0
342	676	told the ambulance what the address of the incident was.	4					1																								1	1
188	677	Not sure																											1
371	678	never been in a situation like that																													1
1005	679	Gave them a band-aid	11												1																	1	0
331	680	i walked them to the first aid room >.<																										1				0
1217	681	ask what their problem and help them with what I can do																										1				0
1593	682	to get up																										1				0
1533	683	Bring them to the nurse																										1				0
1447	684	not sure																											1
662	685	My friend fainted at school so I gave her water and got a teacher																										1				0
1509	686	I took that person to the Nurse and made sure they were assisted/looked at by a nurse. I helped them by holding them while walking to the office.																										1				0
539	687	comfort them																										1				0
330	688	I listened to their struggles/problems that are happening and then recommended them to a health care professional, and still to this day stick by their side																										1				0
619	689	took them to a nurse																										1				0
670	690	Talk to them, and listen to their problem																										1				0
393	691	I listened to their issue and gave them strategies of what they could do to stop the problem.																										1				0
1102	692	Made sure they laid in a way where they can still breathe in oxygen																										1				0
1322	693	I asked the person how they are feeling, if they were feeling a lot of pain, I called the Ambulance as soon as possible and tried to assist the person if I had a spare first aid kit and ask for people to assist.	4					1																								1	1
1588	694	Not sure.																											1
1036	695	I grabbed an ice pack for them to reduce swelling																										1				0
1369	696	seeked help from older people																										1				0
349	697	helped them get to hospital, talked about their problems																										1				0
1390	698	he was sad because he felt alone																										1				0
524	699	ask them about it ask for parents adivice what they want me to do if they need help going to doctor/psyc to seek help																										1				0
692	700	ask if they needed help with carrying things because their wrist was injured																										1				0
1369	701	listen and talk to them																										1				0
585	702	I do not think that i have actually helped someone with first aid or injury but i have talked to them about other personal matters.																													1
1203	703	talk to them																										1				0
607	704	offered help by asking if they were alright, then went to get proper help from a teacher																										1				0
90	705	i spoke to them in order to allow them to get whatever they had to off their chest, it's always good to talk to someone about any issue that is going on in your life, it helps relieve stress.																										1				0
1594	706	talk to them, inform their parent																										1				0
248	707	talked to them about their problems																										1				0
1359	708	I called the adults																										1				0
1024	709	Call the ambulance, DRSABCD	4	1	1			1																								1	0
402	710	I have used my first aid training to help them																										1				0
263	711	called 000	4					1																								1	1
483	712	Asked if they needed anything (e.g. Band-aid)																										1				0
1047	713	I couldn't do anything																										1				0
624	714	Support & performed required treatment.																										1				0
969	715	Help them																										1				0
925	716	try to talk to him and help him to talk much																										1				0
1123	717	comforted them																										1				0
1320	718	Nothing.																											1
1375	719	i haven't helped anyone.																													1
1597	720	be there for them																										1				0
637	721	help them tell someone (adult)																										1				0
9	722	Epi pen	16																	1												1	1
617	723	she broke her arm so I offered her if I could carry her books etc																										1				0
1185	724	I took my friend to the college's nurse straight away because he had a blood nose.																										1				0
120	725	Talked about it with them, told them how they might be able to help from personal experience																										1				0
1231	726	ask them about the issue and what happened																										1				0
1292	727	let them talk, listen to their problems, help overcome their problem with ideas of who they could talk to or what they could do																										1				0
1116	728	I made sure they were okay and could respond to me. Also gave them band-aids and advice on what to do to heal the pain from what they hurt in the following days.	3	11			1								1																	1	0
1534	729	Nothing, because there hasnt been any incident around me																													1
128	730	talked																										1				0
555	731	I put his arm in a sling	10											1																		1	0
559	732	I got someone who knew what they were doing to come immediately																										1				0
927	733	Not sure																											1
235	734	helped them																										1				0
587	735	I got them an ice pack and taped their ankle	9										1																			1	0
1003	736	I helped a friend to confidently talk to a gp																										1				0
119	737	nothing i gave a friendly rub																										1				0
202	738	back problems / patriarchy																										1				0
362	739	Give them a hand if they needed it.																										1				0
1325	740	give him money																										1				0
1370	741	Clean the wound and apply antiseptic cream. In severe cases, i asked for help from adults. (Like deep cuts)	1												1																	1	1
1268	742	I spent a lot of time with them, talked and listened to them, always kept in close contact with them and gave them suggestions and advice																										1				0
747	743	Not sure																											1
232	744	I awkwardly stood there because i was the one who accidentally pushed them over, but i was kinda laughing because they were being a baby about a slight graze on there arm and also kinda laughing because everyone else was cracking up.																										1				0
905	745	Nothin, they didn't need any help																													1
46	746	asked them if they were okay, then got a teacher or parent																										1				0
613	747	help him up and did any of his favours																										1				0
1254	748	Tried to comfort him, got any help so staff nearby																										1				0
1410	749	Be his friend, try to work out what's wrong with him and then fix the problem.																										1				0
1105	750	Asked whether they were ok and offered to help if they needed anything.																										1				0
1170	751	Calmed them down																										1				0
113	752	I let the professionals do their thing																										1				0
770	753	Helped them stand up																										1				0
1613	754	helped to clean the wound and put a band aid on it.	11												1																	1	0
643	755	i was the person																													1
229	756	tried to talk to them about their problems and called the police																										1				0
561	757	talk with him. help him life.																										1				0
900	758	Only if he is in desperate need I ask what is wrong and then try to encourage them to feel better and help them move around																										1				0
127	759	Epilepsy attack called for HELP																										1				0
521	760	Someone who was winded																										1				0
1113	761	Make sure they werent dead																										1				0
1215	762	i offered them to talk to me about what was going on or to talk to someone other than me if they didn't want to																										1				0
743	763	just talk to them																										1				0
251	764	i don't know																											1
15	765	solve ther problem that they have																										1				0
1072	766	I asked them if they were okay, and i offered to call the ambulance for them.	4					1																								1	0
1000	767	Many of the situations have been sporting injuries such as a dislocated shoulder and a rolled ankle. In these two situations I assisted the person off the court and kept the ankle elevated with ice. With the dislocated shoulder I grabbed some ice and got a bucket since she felt sick, I didnt want to touch the shoulder since it could possibly cause more harm	10											1																		1	0
1232	768	the person fell down																										1				0
1610	769	Keeping calm																										1				0
525	770	I just stood by there side, and was there for them. Let them know that they were doing really well (giving the encouragement) Let them talk to me Called the ambulance	4					1																								1	0
224	771	mkefwhsifj																											1
1146	772	give them my advices																										1				0
656	773	Encouraged them to talk about the issue that they were currenntly facing.																										1				0
364	774	I kept talking to her with her mum and making sure she was ok. We are best friends and we always do things together but even if im her only friend I make her happy and she makes me happy because I like her for who she is and we can talk about each others problems.																										1				0
805	775	talk to them and offer help																										1				0
1383	776	not sure																											1
1084	777	i asked them what wa wrong and helped them																										1				0
93	778	I gave them CPR and first aid ASAP	7								1																					1	1
151	779	help old people cross the road																										1				0
350	780	talk to them and hangout with them																										1				0
1549	781	I gave them advice and i called 000 if it was an emergency	4					1																								1	0
812	782	gave them a lift home																										1				0
1291	783	I took her to the nurse's office.																										1				0
1046	784	asked if there was anything I can do for them.																										1				0
61	785	was not there so i could not do anything																													1
438	786	I'm not sure. can't remember																											1
509	787	Rolled ankle: Keep walking and keep it moving																										1				0
1077	788	Helped them walk to a seat																										1				0
1252	789	Put a band aid on the cut	11												1																	1	1
1135	790	-																											1
1083	791	I offered my time in assisting them with any problems they encountered such as using bandaids, bandages and medication. I also let them know I was able to help them																										1				0
116	792	tried to help them out in anyway i could																										1				0
1388	793	I asked the person if they needed help, tell them that I've been feeling as though they have not been well.																										1				0
844	794	Comfort Him																										1				0
1006	795	put bandaid on	11												1																	1	0
650	796	Ask if they're okay, tell someone that the person has been hurt.																										1				0
1073	797	offer to help them do thing, keep them company																										1				0
391	798	tight bandage around their toe. Grab tissues and taught them how to deal with blood nose.	11												1																	1	1
906	799	Nothing there was no person																													1
412	800	i just talked with them and let them know whatever they want to do is their decision but i warned them about not self harming.																										1				0
64	801	helped him																										1				0
578	802	check if their ok or have any serious injuries then called the ambulance if the injury was bad	4					1																								1	0
1478	803	The person was unconscious and not breathing and i had to do CPR which i learnt in year 9 to stabilize the person	7								1																					1	0
857	804	i helped him up																										1				0
912	805	Call help	4					1																								1	0
85	806	talked to them																										1				0
1219	807	Use first aid																										1				0
1227	808	I looked after the person as best as i could until professional aid came to take over.																										1				0
928	809	Offer assistance and act as a stilt to get this person to a higher up																										1				0
1551	810	I called a parent over to call the ambulance																										1				0
496	811	I kept my distance and offered physical support by carrying books																										1				0
1256	812	Nothing																											1
792	813	Got them an icepack - Helped them to walk somewhere to sit down.	9										1																			1	1
1132	814	stuff																											1
41	815	Offered them help																										1				0
1068	816	I did not meet this situation before.																													1
342	817	I stayed with them until an adult was of assistance																										1				0
45	818	I talked to them about their issue and then advised them to talk to a professional. I offered to be there for them anyway whether they decided to or not.																										1				0
808	819	Calmed them down and contacted their parents																										1				0
681	820	no																											1
1622	821	i asked if they were okay and needed help																										1				0
423	822	There are no one who required for help.																													1
1223	823	talk																										1				0
1221	824	I'm unsure of the specifics of the situation, but I know that I did help someone. It was a long time ago.																										1				0
514	825	helped him off the ground																										1				0
130	826	Told them to stay calm.																										1				0
1239	827	Helped them move around and pick up things																										1				0
647	828	I talked to them and told them they could trust me because I trusted them. I gave them advice and told them that I have gone through a similar thing and I will be there any time any day I dont care what time it is. I will always listen to what they have to say and constantly check up on them. I told them they need to talk to an adult as I cannot help them from 5000km away.																										1				0
1061	829	I asked if they were alright, then I went to get help. I then helped with tasks they were unable to complete.																										1				0
748	830	I helped them walk off the hockey pitch to some where they could get medical help.																										1				0
61	831	Tell them to rise the injury, compress it and ice it cos it helps	9										1																			1	1
485	832	I carried her to house																										1				0
902	833	[no response provided]																											1
1538	834	Offer advice and recommended talking to others about it.																										1				0
677	835	applied saline to the cut to clean the wound, used a alcohol-free wipe to further clean the area and advised them to contact a medical professional to deem if the laceration needed stitches	11												1																	1	1
436	836	i made sure they were okay and i helped them in any way i could and called over and adult who was more experienced and could help.																										1				0
478	837	Provided support and comfort when my friend broke his leg, placing his body in comfortable position and carrying the stretcher off the field (was in a footy game)	10											1																		1	0
370	838	Not sure																											1
52	839	Not applicable																											1
837	840	calling for help																										1				0
1612	841	i asked if they required any medical attention and rang 000	4					1																								1	0
986	842	not sure																											1
494	843	I assisted in keeping them calm and collected.																										1				0
1452	844	I called the police and I try to help him.																										1				0
349	845	called 000	4					1																								1	1
1219	846	Make sure this person is okay.																										1				0
502	847	just comforted them																										1				0
872	848	Suggested a doctor, said I was here if they needed aid																										1				0
1529	849	Used R.I.C.E.	9										1																			1	0
429	850	Talked to them about it, tried to make them more comfortable.																										1				0
462	851	Comfort them, get them water etc, call the ambulance	4					1																								1	0
1326	852	i talked to them to see whats wrong and i hanged out with them at all times and i told a teacher about their problem																										1				0
671	853	I dont remember																											1
1364	854	I asked if they were alright, stayed with them and I did anything that I could to help. I tried to grab hold of a teacher and I communicated with other students to get the school nurse to help.																										1				0
489	855	Called a parent and had her go to hospital.																										1				0
297	856	spoke to them about their recovery rather then the incident.																										1				0
848	857	She had a netball injury so I offered her advice on how to treat it and gave her the appropriate first aid equpment e.g compression bandage, tape																										1				0
693	858	I spoke to them letting them know i was there for them and that i would be there to listen. I was showing them i understood how they were feeling and tried helping them as best i could through advice and cheering them up.																										1				0
378	859	Because, if they needed emergency or first aid, then they have obviously hurt themselves, they need to be taken straight away. I would have helped them to the sickbay or help them up if they have hurt their leg.																										1				0
786	860	I tried to offer them support and not talk about their problems																										1				0
328	861	i was there to calm the person down and help them with their breathing																										1				0
335	862	Apply first aid - bandage	10											1																		1	1
267	863	ice leg, bandage, comfort them	9										1																			1	1
205	864	I called the ambulance	4					1																								1	0
324	865	I have not helped anyone																													1
1571	866	Someone fell down and i helped them up and gave them a bandaid	11												1																	1	0
1512	867	Get teacher and try to keep the person still.	22																							1						1	0
740	868	I have never had to help with anything serious.																													1
1066	869	offered to help																										1				0
452	870	?																											1
21	871	im not sure .																											1
1200	872	walk then to where the needed to go																										1				0
766	873	talked to them																										1				0
1381	874	say funny																											1
1348	875	I told him he Is going to be ok																										1				0
879	876	get ice, bandage, ect.	9										1																			1	1
141	877	[no response provided]																											1
859	878	I listened to the person tell me about their problems and I offered my condolescences and i tried to help but i am not trained in this area so I didn't know many good strategies																										1				0
1282	879	I tried to help this person and tell them that everything was going to be okay and that i was there for them if they needed me, i comforted them and tried to make them feel like it was going to be okay																										1				0
668	880	I can't remember very well who I've helped or how																											1
921	881	Unsure if i had contact with someone who had been in an emergency																													1
1241	882	I spoke to her more often and tried to remove her from the mind set that she was in																										1				0
524	883	ask how she was feeling what hurt if not what was wrong has this happened before does she have meds for it																										1				0
1345	884	Going out with her																											1
1502	885	nothing, just talk like normal																										1				0
692	886	Asked if they needed any help and asked the best way to help them to get optimal results																										1				0
1346	887	I talked to him and did some exercise with him.																										1				0
1183	888	I was not at the scene when it happened. I offered mental support in the end.																													1
765	889	offered to carry persons books whilst their leg was in a moon boot																										1				0
614	890	talk to them help them go through it																										1				0
374	891	I didn't do anything because I didn't come across anyone																													1
1327	892	i helped them																										1				0
274	893	Ask them what i could could do for them. And complete what they asked for.																										1				0
1030	894	comfroted them and grabbed a person trained in first aid																										1				0
375	895	I listened about their experience with the injury.																										1				0
635	896	nothing																											1
398	897	Assist them in any way possible to make sure they were okay																										1				0
1499	898	talk																										1				0
546	899	Talk to her and encourage her																										1				0
427	900	ask them if they are ok																										1				0
550	901	I kept asking them how they were feeling and to get them to try and stand up and slowly walk																										1				0
1470	902	put band-aid on the cut	11												1																	1	0
1173	903	i comforted them and made sure they got everything they needed																										1				0
544	904	call the ambulance and make sure that they were relatively safe and okay	4					1																								1	0
567	905	Take them to the first aid room																										1				0
1461	906	I tried to calm the person down.																										1				0
1026	907	called the abulence	4					1																								1	0
500	908	idk																											1
418	909	I dont know																											1
435	910	To help the person, I helped them to be at comfort until the emergency service arrived																										1				0
1374	911	talk to them about the problem																										1				0
891	912	The Person declined, or could not receive my help, due to his hospitalized state																										1				0
779	913	no comment																											1
1051	914	Comfort them																										1				0
1472	915	talked to them about the problem																										1				0
1174	916	Just tell them what they should not do																										1				0
																								Total valid responses	0
		TOTAL			4	5	1	52	4	0	4	0	26	13	48	0	1	4	0	2	1	0	0	0	3	2	2	552	134	3	63
		Percentage of all responses (n = 916)			0.00436681	0.00545852	0.0010917	0.0567686	0.00436681	0	0.00436681	0	0.0283843	0.0141921	0.0524017	0	0.0010917	0.00436681	0	0.00218341	0.0010917	0	0	0	0.00327511	0.00218341	0.00218341	0.60262	0.146288	0.00327511	0.0687773
		Percentage of valid coded responses (n = 172)			0.0233918	0.0292398	0.00584795	0.304094	0.0233918	0	0.0233918	0	0.152047	0.0760234	0.280702	0	0.00584795	0.0233918	0	0.0116959	0.00584795	0	0	0	0.0175439	0.0116959	0.0116959
