# Supplementary material for: Frequency and quality of first aid offered by older adolescents: a cluster randomised crossover trial of school-based first aid courses
Source: PeerJ. 2020 Aug 17;8:e9782. doi: 10.7717/peerj.9782 (PMC7439956; doi:10.7717/peerj.9782)
Supplement: Supplemental Information 3 [file peerj-08-9782-s003.xlsx]

## Sheet: Why not help
PID	Why not help	Time	Random	No help needed	Someone else helped	No prior encounters	Do not know/ unsure	Unaware that first aid was needed	Negative Perspective	Lack adequate skills/ experience	No established rapport	Practical Constraints	No reason	No Code Available	teen (1) or PFA (0)
791	Because it was at a sporting event and there were medics on hand	1	1		1										1
1407	i didnt know what to do	1	4							1					0
480	It was at netball and there was heaps of officials around with proper medical training.	1	5		1										0
728	because i don't know anyone who has required first aid for a mental health problem	1	6			1									1
1592	I dont know how to	1	8							1					0
298	what	1	9											1	1
211	It was in a mosh pit full of lots of people at a concert	1	10										1		0
789	i wasn't there.	1	11									1			1
1464	because i did not meet someone need economy help.	1	12			1									0
84	Never happened	1	13			1									1
1002	They didn't need help	1	14	1											0
1608	They were unaware that I knew, since it was supposed to be a 'secret'.	1	15											1	0
1238	I am not a professional or have proper knowledge of first aid.	1	16							1					1
852	i wasnt sure what was wrong	1	17							1					1
136	He was dead	1	18	1											0
266	don't think i knew anyone that needed first aid	1	19			1									1
1015	The teachers were not letting anybody near him, while we waited of an ambulance.	1	21		1										0
78	I didn't need to help them because someone else helped them	1	22		1										1
752	I have not been in a situation where I've had to help someone	1	23			1									1
994	i was at work	1	24									1			0
822	there wasn't a reason	1	25										1		1
1477	they had already received help/ they didn't need it.	1	27		1										0
892	because here was none	1	28			1									1
165	no reason	1	29										1		0
1350	I didn't need to assist them because i wasn't asked to help	1	30	1											1
1011	i havent been in that sitution	1	31			1									0
1490	nothing	1	33											1	0
377	didn't realize/understand the problem	1	34					1							1
773	i wasn't there	1	35									1			1
469	I can't remember anyone who needed medical help around me in my age group	1	36			1									0
584	because the person didnt exist	1	37			1									0
882	I didn't know how to help	1	38							1					1
25	He was my brother and due to my naiveness, I could not help :(	1	40							1					1
1611	I Did not know about it.	1	42					1							0
638	Someone was already helping the person and i did not need to get in there way	1	43		1										0
424	Because I am not confident enough to do first aid	1	44							1					1
338	They didn't seem like they weren't needing any help and they seemed like they were getting help already and I would've been 1 more person to worry about for them.	1	45		1										1
354	I couldn't help the person as there was no one to help it just said I had to answer the question	1	46			1									1
368	because I let the adults and trainer deal with it because im not trained to help them	1	47		1										1
75	I had no idea what to do I was in a state of shock.	1	49							1					1
291	i dont know	1	50				1								1
522	-I didn't feel like I was well prepared or stay out of the way because I felt like I would make it worse	1	51							1					1
749	i cant fix a broken finger	1	52							1					1
177	I didn't know that they had those problems or that they were that bad	1	54					1							0
604	middle of a footy game	1	55										1		0
89	because I wasn't around when they got an injury, if I came to the place where they got injured, they are probably, most definitely taken to the first aid	1	57									1			1
96	I was far away.	1	58									1			1
547	dont know them that well	1	59								1				0
80	HE PLAYED FOR THE OTHER TEAM WALK IT OFF	1	60										1		1
1171	its because there really was not a serious injury, if there were, they were only minor ones like they can handle them themselves.	1	61	1											1
799	There wasn't a person	1	63			1									1
1591	Not sure	1	64				1								0
1156	[no response provided]	1	66											1	1
508	because there wasn't anybody with a problem.	1	67			1									0
1409	didnt need to	1	68	1											0
1604	He's invisible	1	69			1									0
593	4	1	70											1	0
376	I did not care too much	1	71						1						1
108	nothing happened	1	72			1									1
590	I was not with the person at the time so I was not able to help.	1	74									1			0
999	I have not encountered someone who needs first aid	1	75			1									0
1057	all they needed was a band-aid	1	78	1											0
1001	Because there was someone already helping	1	79		1										0
1211	idk	1	80				1								1
74	because no-one needed?	1	81			1									1
735	The situation was under control and adults were dealing with it.	1	83		1										1
1457	I did not know how to help	1	84							1					0
1315	Could not reach the person	1	85									1			1
1441	I have never come across a person needing first aid	1	86			1									0
455	because I was too shy and scared to do it	1	88							1					0
1062	My Grandad was in a critical condition in hospital on life support	1	89		1										0
1311	I only heard of this person's problems weeks after the event happened. So I was no use but i felt empathy for them because the person was going through a rough time.	1	90									1			1
1079	I didnt have to help anyone	1	92			1									0
1147	I don't know anyone who had these situations	1	93			1									1
506	idk	1	95				1								0
1422	I didn't interact with anyone mate, why are you asking me this question	1	96			1									0
817	I HAVE NEVER HAD TRAINING IN THE AREA OF FIRST AID	1	97							1					1
703	They broke their collarbone while rollerblading on the holidays. There's nothing I can do there except offer my sympathies and wish them a speedy recovery.	1	98							1					1
1222	no one to help	1	99			1									1
616	because he already had assistance with 3 trainers and had a stretcher	1	100		1										0
1207	because i had no one to help.	1	101			1									1
399	I was training and was not qualified to perform first aid as I am also a registered coach at the gym.	1	102							1					1
610	i let the ambulance people do there work. and i was scared	1	104		1										0
716	There were more qualified people doing it	1	105		1										1
758	They were already getting help from a teacher and there was nothing I could do to help.	1	106		1										1
273	Unqualified	1	107							1					1
1448	Because i didnt know what to do	1	108							1					0
344	myself	1	109											1	1
1561	An adult was there who handled the situation	1	110		1										0
698	because I wasn't there when it happened	1	111									1			1
936	it was my brother	1	113										1		0
576	No one required any assistance	1	114	1											0
987	The same time I got to the person, teachers with professional medical knowledge had come so I left it up to them and stepped back to not cause anymore.	1	115		1										0
712	didn't need to	1	116	1											1
245	dunno	1	117				1								1
1496	I didn't know what to do	1	118							1					0
1087	didnt do anything	1	119										1		0
196	wasn't there and he didn't require immediate first aid	1	120	1								1			0
209	CAUSE I DONT LIKE HIM	1	121						1						0
1130	we were at a party and about 12 people were helping him already i was going to call 000 but someone was already doing so	1	122		1										0
135	I didn't know what problem they had.	1	123							1					0
49	I was scared because he was trying to hide a knife in his coat.	1	125						1						1
184	TOO WEIRDED OUT	1	126						1						0
517	The first aid team was already there.	1	127		1										0
256	no reasons	1	128										1		1
101	don't know	1	130				1								1
821	scared	1	131						1						1
1100	I wasn't there and somebody else helped them	1	132		1							1			0
137	I saved their lives (am a hero)	1	133											1	0
18	i didnt see anyone with a problem	1	134			1									1
676	because they didn't require any help.	1	136	1											1
770	Other people were helping them.	1	138		1										1
995	djsdhjfh	1	139											1	0
814	I never meet	1	141			1									1
1043	They were knocked out while playing football.	1	142									1			0
	TOTALS TIME 1	115		10	21	24	6	3	5	19	1	12	8	8
	%			0.0869565	0.182609	0.208696	0.0521739	0.026087	0.0434783	0.165217	0.00869565	0.104348	0.0695652	0.0695652
614	because	3	2											1	0
147	because there was no one that I knew of who had an accident	3	3			1									0
131	FUCK THAT GUY	3	7						1						0
384	because they did not exist. i have not come across anyone with a physical injury that required first aid.	3	20			1									1
538	I wasn't there when it happened and was unable to help at the time.	3	26									1			0
734	They were being helped by somebody with first aid training	3	32		1										1
855	No	3	39											1	1
110	didn't know that person	3	41								1				1
850	no one need help	3	48			1									1
418	nothing hape	3	53			1									1
351	someone else was taking care of them	3	56		1										1
106	THERE WAS NO ONE TO HELP MN	3	62									1			1
50	already being helped by a big group of people	3	65		1										1
109	gtrhrt	3	73											1	1
563	There was already a trained doctor on the scene	3	76		1										0
252	i don't know how to fix broken legs	3	77							1					1
461	NO ONE TO HELP	3	82			1									0
877	no help needed	3	87	1											1
834	Danger	3	91											1	1
890	didnt trust the person	3	94						1						1
1487	There was no one to help.	3	103			1									0
515	no person	3	112			1									0
454	no situation to help	3	124			1									0
599	i havent encountered any issues	3	129			1									0
571	one was my brother so i was not inclined to help them, the other was technique self harm and was really funny	3	135						1						0
156	IDK	3	137				1								0
568	Because someone else already was.	3	140		1										0
909	They were in hospital receiving professional care	3			1										0
971	well I've never been in contact with anyone for needed first aid	3				1									0
1025	Not sure	3					1								0
1036	They were rushed to hospital, I was not needed.	3			1										0
1052	Wasn't anyone who needed help	3				1									0
1058	their problems are dangerous or they can't listen to anyone or they don't even notice they have mental problems	3							1						0
1082	Not sure about the solutions to solve the problems	3								1					0
1102	I was in spain	3										1			0
1132	because I was on the side lines watching someone else do it	3			1										1
1146	I can not help the person because I am suffering the same issue as them	3										1			1
1147	Either because I didn't know what to do or because I haven't realised they had a physical injury	3						1		1					1
1218	i don't know	3					1								1
1250	She was not injured in a major way and didn't let anyone know until we saw the scrape	3						1							1
1308	because i don't know anyone about my age who had contact and required first aid for a physical injury or emergency	3				1									1
1345	he or she is crazy	3							1						1
1347	havent met once	3				1									1
	TOTAL TIME 3	43		1	8	13	3	2	5	3	1	4	0	4
	%			0.037037	0.296296	0.481481	0.111111	0.0740741	0.185185	0.111111	0.037037	0.148148	0	0.148148
		115		10	21	24	6	3	5	19	1	12	8	8
		158		11	29	37	9	5	10	22	2	16	8	12
				0.0696203	0.183544	0.234177	0.056962	0.0316456	0.0632911	0.139241	0.0126582	0.101266	0.0506329	0.0759494
	Excluded no prior encounters (n=37) and no code available (n=12) codes as they do not make sense within the context of the question --> 158-49 --> n=109 for remaining responses.			0.100917	0.266055		0.0825688	0.0458716	0.0917431	0.201835	0.0183486	0.146789	0.0733945

## Sheet: By intervention
PID	Why not help	Time	Random	No help needed	Someone else helped	No prior encounters	Do not know/ unsure	Unaware that first aid was needed	Negative Perspective	Lack adequate skills/ experience	No established rapport	Practical Constraints	No reason	No Code Available	teen (1) or PFA (0)
791	Because it was at a sporting event and there were medics on hand	1	1		1										1
1407	i didnt know what to do	1	4							1					0
480	It was at netball and there was heaps of officials around with proper medical training.	1	5		1										0
728	because i don't know anyone who has required first aid for a mental health problem	1	6			1									1
1592	I dont know how to	1	8							1					0
298	what	1	9											1	1
211	It was in a mosh pit full of lots of people at a concert	1	10										1		0
789	i wasn't there.	1	11									1			1
1464	because i did not meet someone need economy help.	1	12			1									0
84	Never happened	1	13			1									1
1002	They didn't need help	1	14	1											0
1608	They were unaware that I knew, since it was supposed to be a 'secret'.	1	15											1	0
1238	I am not a professional or have proper knowledge of first aid.	1	16							1					1
852	i wasnt sure what was wrong	1	17							1					1
136	He was dead	1	18	1											0
266	don't think i knew anyone that needed first aid	1	19			1									1
1015	The teachers were not letting anybody near him, while we waited of an ambulance.	1	21		1										0
78	I didn't need to help them because someone else helped them	1	22		1										1
752	I have not been in a situation where I've had to help someone	1	23			1									1
994	i was at work	1	24									1			0
822	there wasn't a reason	1	25										1		1
1477	they had already received help/ they didn't need it.	1	27		1										0
892	because here was none	1	28			1									1
165	no reason	1	29										1		0
1350	I didn't need to assist them because i wasn't asked to help	1	30	1											1
1011	i havent been in that sitution	1	31			1									0
1490	nothing	1	33											1	0
377	didn't realize/understand the problem	1	34					1							1
773	i wasn't there	1	35									1			1
469	I can't remember anyone who needed medical help around me in my age group	1	36			1									0
584	because the person didnt exist	1	37			1									0
882	I didn't know how to help	1	38							1					1
25	He was my brother and due to my naiveness, I could not help :(	1	40							1					1
1611	I Did not know about it.	1	42					1							0
638	Someone was already helping the person and i did not need to get in there way	1	43		1										0
424	Because I am not confident enough to do first aid	1	44							1					1
338	They didn't seem like they weren't needing any help and they seemed like they were getting help already and I would've been 1 more person to worry about for them.	1	45		1										1
354	I couldn't help the person as there was no one to help it just said I had to answer the question	1	46			1									1
368	because I let the adults and trainer deal with it because im not trained to help them	1	47		1										1
75	I had no idea what to do I was in a state of shock.	1	49							1					1
291	i dont know	1	50				1								1
522	-I didn't feel like I was well prepared or stay out of the way because I felt like I would make it worse	1	51							1					1
749	i cant fix a broken finger	1	52							1					1
177	I didn't know that they had those problems or that they were that bad	1	54					1							0
604	middle of a footy game	1	55										1		0
89	because I wasn't around when they got an injury, if I came to the place where they got injured, they are probably, most definitely taken to the first aid	1	57									1			1
96	I was far away.	1	58									1			1
547	dont know them that well	1	59								1				0
80	HE PLAYED FOR THE OTHER TEAM WALK IT OFF	1	60										1		1
1171	its because there really was not a serious injury, if there were, they were only minor ones like they can handle them themselves.	1	61	1											1
799	There wasn't a person	1	63			1									1
1591	Not sure	1	64				1								0
1156	[no response provided]	1	66											1	1
508	because there wasn't anybody with a problem.	1	67			1									0
1409	didnt need to	1	68	1											0
1604	He's invisible	1	69			1									0
593	4	1	70											1	0
376	I did not care too much	1	71						1						1
108	nothing happened	1	72			1									1
590	I was not with the person at the time so I was not able to help.	1	74									1			0
999	I have not encountered someone who needs first aid	1	75			1									0
1057	all they needed was a band-aid	1	78	1											0
1001	Because there was someone already helping	1	79		1										0
1211	idk	1	80				1								1
74	because no-one needed?	1	81			1									1
735	The situation was under control and adults were dealing with it.	1	83		1										1
1457	I did not know how to help	1	84							1					0
1315	Could not reach the person	1	85									1			1
1441	I have never come across a person needing first aid	1	86			1									0
455	because I was too shy and scared to do it	1	88							1					0
1062	My Grandad was in a critical condition in hospital on life support	1	89		1										0
1311	I only heard of this person's problems weeks after the event happened. So I was no use but i felt empathy for them because the person was going through a rough time.	1	90									1			1
1079	I didnt have to help anyone	1	92			1									0
1147	I don't know anyone who had these situations	1	93			1									1
506	idk	1	95				1								0
1422	I didn't interact with anyone mate, why are you asking me this question	1	96			1									0
817	I HAVE NEVER HAD TRAINING IN THE AREA OF FIRST AID	1	97							1					1
703	They broke their collarbone while rollerblading on the holidays. There's nothing I can do there except offer my sympathies and wish them a speedy recovery.	1	98							1					1
1222	no one to help	1	99			1									1
616	because he already had assistance with 3 trainers and had a stretcher	1	100		1										0
1207	because i had no one to help.	1	101			1									1
399	I was training and was not qualified to perform first aid as I am also a registered coach at the gym.	1	102							1					1
610	i let the ambulance people do there work. and i was scared	1	104		1										0
716	There were more qualified people doing it	1	105		1										1
758	They were already getting help from a teacher and there was nothing I could do to help.	1	106		1										1
273	Unqualified	1	107							1					1
1448	Because i didnt know what to do	1	108							1					0
344	myself	1	109											1	1
1561	An adult was there who handled the situation	1	110		1										0
698	because I wasn't there when it happened	1	111									1			1
936	it was my brother	1	113										1		0
576	No one required any assistance	1	114	1											0
987	The same time I got to the person, teachers with professional medical knowledge had come so I left it up to them and stepped back to not cause anymore.	1	115		1										0
712	didn't need to	1	116	1											1
245	dunno	1	117				1								1
1496	I didn't know what to do	1	118							1					0
1087	didnt do anything	1	119										1		0
196	wasn't there and he didn't require immediate first aid	1	120	1								1			0
209	CAUSE I DONT LIKE HIM	1	121						1						0
1130	we were at a party and about 12 people were helping him already i was going to call 000 but someone was already doing so	1	122		1										0
135	I didn't know what problem they had.	1	123							1					0
49	I was scared because he was trying to hide a knife in his coat.	1	125						1						1
184	TOO WEIRDED OUT	1	126						1						0
517	The first aid team was already there.	1	127		1										0
256	no reasons	1	128										1		1
101	don't know	1	130				1								1
821	scared	1	131						1						1
1100	I wasn't there and somebody else helped them	1	132		1							1			0
137	I saved their lives (am a hero)	1	133											1	0
18	i didnt see anyone with a problem	1	134			1									1
676	because they didn't require any help.	1	136	1											1
770	Other people were helping them.	1	138		1										1
995	djsdhjfh	1	139											1	0
814	I never meet	1	141			1									1
1043	They were knocked out while playing football.	1	142									1			0
614	because	3	2											1	0
147	because there was no one that I knew of who had an accident	3	3			1									0
131	FUCK THAT GUY	3	7						1						0
384	because they did not exist. i have not come across anyone with a physical injury that required first aid.	3	20			1									1
538	I wasn't there when it happened and was unable to help at the time.	3	26									1			0
734	They were being helped by somebody with first aid training	3	32		1										1
855	No	3	39											1	1
110	didn't know that person	3	41								1				1
850	no one need help	3	48			1									1
418	nothing hape	3	53			1									1
351	someone else was taking care of them	3	56		1										1
106	THERE WAS NO ONE TO HELP MN	3	62									1			1
50	already being helped by a big group of people	3	65		1										1
109	gtrhrt	3	73											1	1
563	There was already a trained doctor on the scene	3	76		1										0
252	i don't know how to fix broken legs	3	77							1					1
461	NO ONE TO HELP	3	82			1									0
877	no help needed	3	87	1											1
834	Danger	3	91											1	1
890	didnt trust the person	3	94						1						1
1487	There was no one to help.	3	103			1									0
515	no person	3	112			1									0
454	no situation to help	3	124			1									0
599	i havent encountered any issues	3	129			1									0
571	one was my brother so i was not inclined to help them, the other was technique self harm and was really funny	3	135						1						0
156	IDK	3	137				1								0
568	Because someone else already was.	3	140		1										0
909	They were in hospital receiving professional care	3			1										0
971	well I've never been in contact with anyone for needed first aid	3				1									0
1025	Not sure	3					1								0
1036	They were rushed to hospital, I was not needed.	3			1										0
1052	Wasn't anyone who needed help	3				1									0
1058	their problems are dangerous or they can't listen to anyone or they don't even notice they have mental problems	3							1						0
1082	Not sure about the solutions to solve the problems	3								1					0
1102	I was in spain	3										1			0
1132	because I was on the side lines watching someone else do it	3			1										1
1146	I can not help the person because I am suffering the same issue as them	3										1			1
1147	Either because I didn't know what to do or because I haven't realised they had a physical injury	3						1		1					1
1218	i don't know	3					1								1
1250	She was not injured in a major way and didn't let anyone know until we saw the scrape	3						1							1
1308	because i don't know anyone about my age who had contact and required first aid for a physical injury or emergency	3				1									1
1345	he or she is crazy	3							1						1
1347	havent met once	3				1									1
	PFA			6	17	18	4	2	5	8	1	7	5	6
	tMHFA			5	12	19	5	3	5	14	1	9	3	6
	TOTALS	158		11	29	37	9	5	10	22	2	16	8	12
