# Supplementary material for: Frequency and quality of first aid offered by older adolescents: a cluster randomised crossover trial of school-based first aid courses
Source: PeerJ journal article supplement (doi:10.7717/peerj.9782), 2020-08-17
Supplement: teenAID_P1_Apr16.pdf [file teenAID_P1_Apr16.pdf]

## teenAID - Participant information (P1)

What is First Aid Training for Common Injuries or Emergencies in Teens?

The "First Aid Training for Common Injuries or Emergencies in Teens" program is a 3 hour non-accredited course, designed to equip adolescents with the skills to provide basic physical first aid to their peers. The program is designed to develop students' knowledge and skills in:

- Chain of survival
- DRSABCD
- Recovery position
- CPR and defibrillation
- Basic first aid for common injuries and emergencies such as sprains, strains, fractures, dislocations, concussions, asthma, anaphylaxis etc.

The program is presented by an experienced first aid instructor from Australian Red Cross. Teaching sessions involve a powerpoint presentation and practical demonstrations of techniques such as the recovery position and CPR.

What is the purpose of this research?

The research aims to compare two different types of first aid courses for teens ("teen Mental Health First Aid", and "First Aid for Common Injuries and Emergencies in Teens"), to assess their effectiveness in teaching teens to assist their peers in a first aid situation.

Who is conducting this research?

This research is being conducted by a team from the University of Melbourne. Funding for this program has been provided by an Australian Rotary Health Research Project Grant.

Two of the investigators are employees of the not-for-profit organisation Mental Health First Aid Australia and another is chair of its board.

What will the research involve for students?

To track how students' knowledge of physical injuries and first aid strategies change over time, students will be asked to complete questionnaires at three time points: before the program is presented, after the teaching session/s, and 12 months after the training has finished. The questionnaires will be completed online and it is estimated they will each take around 20-30 minutes to complete. Students will be able to complete the questionnaires during class time.

Is participation in this research confidential?

The program will be presented during students' normal class times. This means that student identities cannot be kept completely anonymous from the program instructor or the research manager who will be present. However, all information provided when responding to the questionnaires is confidential. All results from the questionnaires will be published in the form of group percentages and not individual responses. The information provided by participants will be stored electronically and held under password protection, for a minimum period of 5 years. The data will not be used for any purposes other than those described here.

According to the preference of the school, student surveys will either be sent by the school to the student's email address, without any contact details being given to the research team, or will be handed to students in hard copy during class time. Alternatively, students can select in the second questionnaire to receive the following questionnaires directly to their personal email address by supplying this to the research team. This option is, however, the individual preference of the student and there are no repercussions if an email address is not supplied.

Names will not be used on the questionnaire and a Victorian Student Identification Number will be used in their place. The use of student ID numbers is considered necessary by the research team to ensure the safety of participants. In the event of a participant requesting assistance as a result of becoming distressed, the student ID allows the research team to notify the school of the student's identity without providing the identity to the research team. Student ID numbers will be removed from files storing survey responses, but a key will be retained linking survey IDs with student IDs so that we can match surveys across time points. Data will be stored with survey IDs, with the linking key stored securely in a separate file.

While every effort will be made to protect the identity of participants, there are legal limitations to data confidentiality. For instance, it is possible for data to be subject to subpoena or freedom of information request. However, all data will be retained in a de-identified format.

How will the outcome/results of this research be made public?

The findings of this research will be published in a scientific journal, on the mental health first aid website ([www.mhfa.com.au](http://www.mhfa.com.au)) and in training materials. Results may also be presented and discussed at local, national and international conferences on youth mental health, or mental health first aid.

Are there any risks?

The questionnaires contain some questions about mental illness, which can be a little distressing to some people. A number of resources, such as helplines and websites, will be given to students before and after the training. A welfare coordinator will be present at times when student surveys are being completed.

If you are distressed about the issues discussed in the training or in the questionnaires, there are a number of services that are available for you to contact, provided at the end of this questionnaire. Alternatively, you can contact the research assistant, Ms. Alyssia Rossetto, on [alyssia.rossetto@unimelb.edu.au](mailto:alyssia.rossetto@unimelb.edu.au)

What are the benefits?

Students will receive the training free of charge. By attending this course, students will be taught a range of skills for assisting others in the event of a physical injury.

The information provided in the questionnaires will assist us in developing first aid materials in the future.

Participation in this research will therefore benefit future students across Australia and internationally, who receive the training.

How can I get further information?

If you would like further information before deciding whether to participate, please contact:

Ms. Alyssia Rossetto

email: [alyssia.rossetto@unimelb.edu.au](mailto:alyssia.rossetto@unimelb.edu.au), phone: 03 9035 6029

Population Mental Health Group, University of Melbourne

Alyssia is the Research Assistant for the teenAID evaluation project.

If you have questions about the first aid training or first aid instructors, please contact the Research Assistant, Ms. Alyssia Rossetto, who can forward on your query to Australian Red Cross.

Laura Hart is the Chief Investigator of the teenAID evaluation project, and is responsible for the design and conduct of the trial.

email: [lhart@unimelb.edu.au](mailto:lhart@unimelb.edu.au)

Population Mental Health Group, University of Melbourne

If you have questions about the scientific aspects of the study, please contact:

Professor Tony Jorm

email: [ajorm@unimelb.edu.au](mailto:ajorm@unimelb.edu.au), phone: 03 9035 7799

Population Mental Health Group, University of Melbourne

Tony is a Professorial Fellow and Scientific Director of MHFAustralia.

This research has been approved by University of Melbourne Human Research Ethics Committee.

If you have concerns about the ethics of the study, please contact:

Manager

Human Research Ethics, The University of Melbourne

phone: 03 8344 2073

Ethics approval number: 1341238.3

Version 2 May 2014

**This is about whether you agree to participate in the research.**

1. Please enter your Participant Identification Number

**2. Would you like to proceed with the survey?**

- Yes, I have read and understood the information provided to me and would like to proceed
- No, I do not want to complete this survey

## teenAID - Demographics

**This page contains some questions about you.**

3. What is your age?

- 14
- 15
- 16
- 17
- 18

4. How many months since your last birthday?

- |                         |                         |                          |
|-------------------------|-------------------------|--------------------------|
| <input type="radio"/> 0 | <input type="radio"/> 4 | <input type="radio"/> 8  |
| <input type="radio"/> 1 | <input type="radio"/> 5 | <input type="radio"/> 9  |
| <input type="radio"/> 2 | <input type="radio"/> 6 | <input type="radio"/> 10 |
| <input type="radio"/> 3 | <input type="radio"/> 7 | <input type="radio"/> 11 |

5. What is your gender?

- Male
- Female
- I identify with another term

6. Is English your first language? (i.e. the language you speak at home with your family?)

- Yes
- No

7. Will you be 15 or older in 2015?

- Yes
- No

*Please read John's story carefully, as the following questions relate to it.*

**John's Story**

John is a 16 year old who has been unusually sad and miserable for the last few weeks. He is tired all the time and has trouble sleeping at night. John doesn't feel like eating and has lost weight. He can't keep his mind on his studies and his marks have dropped. He puts off making any decisions and even day-to-day tasks seem too much for him. His parents and friends are very concerned about him. John says he will never be happy again and believes his family would be better off without him. John says he feels so desperate, he has been thinking of ways to end his life.

8. What, if anything, do you think is wrong with John?

*Please write your answer in the box*

9. If John was a friend, I would help him.

|                       |                       |                       |                           |                       |                       |                       |
|-----------------------|-----------------------|-----------------------|---------------------------|-----------------------|-----------------------|-----------------------|
| Strongly disagree     | Disagree              | Somewhat disagree     | Neither agree or disagree | Somewhat agree        | Agree                 | Strongly agree        |
| <input type="radio"/> | <input type="radio"/> | <input type="radio"/> | <input type="radio"/>     | <input type="radio"/> | <input type="radio"/> | <input type="radio"/> |

10. If John was a friend, I would...

*Please note: you can select more than one option.*

- Tell John what he needs to do to fix his problems.
- Invite John to hang out and do something fun with me.
- Ignore John because he is being attention-seeking.
- Let John know I won't want to be friends with him any more if he's like this all the time.
- Avoid talking about suicide, because it might put the idea in John's head.
- Tell John I have noticed something seems wrong, and I want to make sure he is okay.
- Suggest John tell a health professional about his problems (e.g. a counsellor, GP, or psychologist).
- Suggest John tell an adult (other than a health professional) about his problems (e.g. a parent or teacher).
- Ask John if he is thinking of suicide.
- Encourage John to take responsibility and deal with his problems on his own.
- Listen to John talk about his problems.
- Not do anything.

Other (please specify):

11. If John was a friend, how confident would you feel in helping him?

|                       |                        |                       |                       |                       |
|-----------------------|------------------------|-----------------------|-----------------------|-----------------------|
| Not at all confident  | A little bit confident | Moderately confident  | Quite a bit confident | Extremely confident   |
| <input type="radio"/> | <input type="radio"/>  | <input type="radio"/> | <input type="radio"/> | <input type="radio"/> |

12. Which of the following people do you think would be helpful, harmful, or neither helpful nor harmful, for John's problem?

|                                              | Helpful               | Neither               | Harmful               |
|----------------------------------------------|-----------------------|-----------------------|-----------------------|
| Counsellor                                   | <input type="radio"/> | <input type="radio"/> | <input type="radio"/> |
| General practitioner (GP) or family doctor   | <input type="radio"/> | <input type="radio"/> | <input type="radio"/> |
| Psychologist                                 | <input type="radio"/> | <input type="radio"/> | <input type="radio"/> |
| Close friend                                 | <input type="radio"/> | <input type="radio"/> | <input type="radio"/> |
| Family member                                | <input type="radio"/> | <input type="radio"/> | <input type="radio"/> |
| Parent                                       | <input type="radio"/> | <input type="radio"/> | <input type="radio"/> |
| Teacher                                      | <input type="radio"/> | <input type="radio"/> | <input type="radio"/> |
| School Welfare Coordinator/School Counsellor | <input type="radio"/> | <input type="radio"/> | <input type="radio"/> |
| Minister or priest                           | <input type="radio"/> | <input type="radio"/> | <input type="radio"/> |

13. In the list provided in the question above, which one person do you think is the most helpful for John's problem?

- Close friend
- Counsellor
- Family member
- General practitioner (GP) or family doctor
- Minister or priest
- Parent
- Psychologist
- School Welfare Coordinator/School Counsellor
- Teacher
- None of the above

14. If I had a problem right now like John's, I would...

*Please note: you can select more than one option.*

- Try to deal with it on my own.
- Talk to a friend about it.
- Talk to a health professional about it (e.g. a counsellor, GP or psychologist).
- Talk to an adult (other than a health professional) about it (e.g. a parent or teacher).
- Improve my diet.
- Try to get more sleep.
- Spend more time with friends.
- Try to do more exercise.
- Look for information about my problem on the internet.
- Do nothing.

Other (please specify):

15. Please indicate how strongly you personally agree or disagree with each statement

|                                                                                               | Strongly disagree     | Disagree              | Neither agree nor disagree | Agree                 | Strongly agree        |
|-----------------------------------------------------------------------------------------------|-----------------------|-----------------------|----------------------------|-----------------------|-----------------------|
| People with a problem like John could snap out of it if they wanted.                          | <input type="radio"/> | <input type="radio"/> | <input type="radio"/>      | <input type="radio"/> | <input type="radio"/> |
| A problem like John's is a sign of personal weakness.                                         | <input type="radio"/> | <input type="radio"/> | <input type="radio"/>      | <input type="radio"/> | <input type="radio"/> |
| John's problem is not a real medical illness.                                                 | <input type="radio"/> | <input type="radio"/> | <input type="radio"/>      | <input type="radio"/> | <input type="radio"/> |
| People with a problem like John's are dangerous.                                              | <input type="radio"/> | <input type="radio"/> | <input type="radio"/>      | <input type="radio"/> | <input type="radio"/> |
| It is best to avoid people with a problem like John's so that you don't develop this problem. | <input type="radio"/> | <input type="radio"/> | <input type="radio"/>      | <input type="radio"/> | <input type="radio"/> |
| People with a problem like John's are unpredictable.                                          | <input type="radio"/> | <input type="radio"/> | <input type="radio"/>      | <input type="radio"/> | <input type="radio"/> |
| If I had a problem like John's I would not tell anyone.                                       | <input type="radio"/> | <input type="radio"/> | <input type="radio"/>      | <input type="radio"/> | <input type="radio"/> |

16. The following questions ask how you would feel about spending time with John.

*Would you be happy to:*

|                                       | Yes definitely        | Yes probably          | Probably not          | Definitely not        |
|---------------------------------------|-----------------------|-----------------------|-----------------------|-----------------------|
| Go out with John on the weekend?      | <input type="radio"/> | <input type="radio"/> | <input type="radio"/> | <input type="radio"/> |
| Work on a project with John?          | <input type="radio"/> | <input type="radio"/> | <input type="radio"/> | <input type="radio"/> |
| Invite John around to your house?     | <input type="radio"/> | <input type="radio"/> | <input type="radio"/> | <input type="radio"/> |
| Go to John's house?                   | <input type="radio"/> | <input type="radio"/> | <input type="radio"/> | <input type="radio"/> |
| Develop a close friendship with John? | <input type="radio"/> | <input type="radio"/> | <input type="radio"/> | <input type="radio"/> |

## teenAID - Jeanie's story

***Please read Jeanie's story carefully, as the following questions relate to it.***

### **Jeanie's Story**

**Jeanie is a 16 year old living at home with her parents. Jeanie started at your school last year and you are the only friend she has made so far. She seems very shy and when you ask her why she doesn't make more of an effort, she says she would really like to make more friends but is scared that she'll do or say something embarrassing when she's around others. Although Jeanie's schoolwork is OK she rarely says a word in class and becomes incredibly nervous, trembles, blushes and seems like she might vomit if she has to answer a question or speak in front of the class. At her house you have seen that Jeanie is quite talkative with her family, but becomes quiet if anyone she doesn't know well comes over. She has stopped answering the phone and doesn't come to parties anymore. Jeanie says she knows her fears are unreasonable but she can't seem to control them and this really upsets her.**

17. What, if anything, do you think is wrong with Jeanie?

18. If Jeanie was a friend, I would help her.

|                       |                       |                       |                                 |                       |                       |                       |
|-----------------------|-----------------------|-----------------------|---------------------------------|-----------------------|-----------------------|-----------------------|
| Strongly<br>disagree  | Disagree              | Somewhat<br>disagree  | Neither<br>agree or<br>disagree | Somewhat<br>agree     | Agree                 | Strongly<br>agree     |
| <input type="radio"/> | <input type="radio"/> | <input type="radio"/> | <input type="radio"/>           | <input type="radio"/> | <input type="radio"/> | <input type="radio"/> |

19. If Jeanie was a friend, I would...

*Please note: you can select more than one option.*

- Tell Jeanie what she needs to do to fix her problems.
- Invite Jeanie to hang out and do something fun with me.
- Ignore Jeanie because she is being attention-seeking.
- Let Jeanie know I won't want to be friends with her any more if she's like this all the time.
- Avoid talking about suicide, because it might put the idea in Jeanie's head.
- Tell Jeanie I have noticed something seems wrong, and I want to make sure she is okay.
- Suggest Jeanie tell a health professional about her problems (e.g. a counsellor, GP, or psychologist).
- Suggest Jeanie tell an adult (other than a health professional) about her problems (e.g. a parent or teacher).
- Ask Jeanie if she is thinking of suicide.
- Encourage Jeanie to take responsibility and deal with her problems on her own.
- Listen to Jeanie talk about her problems.
- Not do anything.

Other (please specify):

20. If Jeanie was a friend, how confident would you feel in helping her?

|                       |                        |                       |                       |                       |
|-----------------------|------------------------|-----------------------|-----------------------|-----------------------|
| Not at all confident  | A little bit confident | Moderately confident  | Quite a bit confident | Extremely confident   |
| <input type="radio"/> | <input type="radio"/>  | <input type="radio"/> | <input type="radio"/> | <input type="radio"/> |



21. Which of the following people do you think would be helpful, harmful, or neither helpful nor harmful, for Jeanie's problem?

|                                              | Helpful               | Neither               | Harmful               |
|----------------------------------------------|-----------------------|-----------------------|-----------------------|
| Counsellor                                   | <input type="radio"/> | <input type="radio"/> | <input type="radio"/> |
| General practitioner (GP) or family doctor   | <input type="radio"/> | <input type="radio"/> | <input type="radio"/> |
| Psychologist                                 | <input type="radio"/> | <input type="radio"/> | <input type="radio"/> |
| Close friend                                 | <input type="radio"/> | <input type="radio"/> | <input type="radio"/> |
| Family member                                | <input type="radio"/> | <input type="radio"/> | <input type="radio"/> |
| Parent                                       | <input type="radio"/> | <input type="radio"/> | <input type="radio"/> |
| Teacher                                      | <input type="radio"/> | <input type="radio"/> | <input type="radio"/> |
| School Welfare Coordinator/School Counsellor | <input type="radio"/> | <input type="radio"/> | <input type="radio"/> |
| Minister or priest                           | <input type="radio"/> | <input type="radio"/> | <input type="radio"/> |

22. In the list provided in the question above, which one person do you think is the most helpful for Jeanie's problem?

- Close friend
- Counsellor
- Family member
- General practitioner (GP) or family doctor
- Minister or priest
- Parent
- Psychologist
- School Welfare Coordinator/School Counsellor
- Teacher
- None of the above

23. If I had a problem right now like Jeanie's, I would...

*Please note: you can select more than one option.*

- Try to deal with it on my own.
- Talk to a friend about it.
- Talk to a health professional about it (e.g. a counsellor, GP or psychologist).
- Talk to an adult (other than a health professional) about it (e.g. a parent or teacher).
- Improve my diet.
- Try to get more sleep.
- Spend more time with friends.
- Try to do more exercise.
- Look for information about my problem on the internet.
- Do nothing.

Other (please specify)

24. Please indicate how strongly you personally agree or disagree with each statement

|                                                                                                 | Strongly disagree     | Disagree              | Neither agree nor disagree | Agree                 | Strongly agree        |
|-------------------------------------------------------------------------------------------------|-----------------------|-----------------------|----------------------------|-----------------------|-----------------------|
| People with a problem like Jeanie's could snap out of it if they wanted.                        | <input type="radio"/> | <input type="radio"/> | <input type="radio"/>      | <input type="radio"/> | <input type="radio"/> |
| A problem like Jeanie's is a sign of personal weakness.                                         | <input type="radio"/> | <input type="radio"/> | <input type="radio"/>      | <input type="radio"/> | <input type="radio"/> |
| Jeanie's problem is not a real medical illness.                                                 | <input type="radio"/> | <input type="radio"/> | <input type="radio"/>      | <input type="radio"/> | <input type="radio"/> |
| People with a problem like Jeanie's are dangerous.                                              | <input type="radio"/> | <input type="radio"/> | <input type="radio"/>      | <input type="radio"/> | <input type="radio"/> |
| It is best to avoid people with a problem like Jeanie's so that you don't develop this problem. | <input type="radio"/> | <input type="radio"/> | <input type="radio"/>      | <input type="radio"/> | <input type="radio"/> |
| People with a problem like Jeanie's are unpredictable.                                          | <input type="radio"/> | <input type="radio"/> | <input type="radio"/>      | <input type="radio"/> | <input type="radio"/> |
| If I had a problem like Jeanie's I would not tell anyone.                                       | <input type="radio"/> | <input type="radio"/> | <input type="radio"/>      | <input type="radio"/> | <input type="radio"/> |

25. The following questions ask how you would feel about spending time with Jeanie.

*Would you be happy to:*

|                                         | Yes definitely        | Yes probably          | Probably not          | Definitely not        |
|-----------------------------------------|-----------------------|-----------------------|-----------------------|-----------------------|
| Go out with Jeanie on the weekend?      | <input type="radio"/> | <input type="radio"/> | <input type="radio"/> | <input type="radio"/> |
| Work on a project with Jeanie?          | <input type="radio"/> | <input type="radio"/> | <input type="radio"/> | <input type="radio"/> |
| Invite Jeanie around to your house?     | <input type="radio"/> | <input type="radio"/> | <input type="radio"/> | <input type="radio"/> |
| Go to Jeanie's house?                   | <input type="radio"/> | <input type="radio"/> | <input type="radio"/> | <input type="radio"/> |
| Develop a close friendship with Jeanie? | <input type="radio"/> | <input type="radio"/> | <input type="radio"/> | <input type="radio"/> |

## teenAID - Experience of first aid situations

**This page asks about your experiences of common problems requiring first aid. Please read each question carefully and fill out any boxes when they apply.**

26. In the last 12 months have you come across someone *about your age* (i.e. between 13-18 years old) who has required first aid because of an emergency or injury?

*Please do not report any adults you have had contact with. For this question, we are just interested in people around your age who you may have helped.*

- Yes - please go on to Q27 below
- No - please go on to Q31 on the next page
- Not sure - please go to Q27 below
- I don't want to answer this question - please go on to Q31 on the next page.

## teenAID survey: help you have given

**This page contains questions about the help you provided to the person/people about your age.**

27. Please tell us *how many people about your age* you had contact with who required first aid for an injury or emergency:

If you have had contact with **more than one** person about your age who required first aid, please answer the following questions **about the person you know best**. If you only had contact with one person, please answer the following questions about that person.

28. Did you offer the person any help?

- Yes - please go on to Q29 below.
- No - please go on to Q30 on the next page.
- Not sure - please go on to Q29 below.

teenAID: help you have given

**This page asks about what you did to help the person.**

29. What did you do to help the person?

teenAID: help you have given

**This page contains questions about why you may not have been able to help the person.**

30. What was the reason(s) that you were not able to help the person?

teenAID: help you have received

31. In the last 12 months have *you* required first aid because of an emergency or injury?

- Yes - please go on to Q32 below.
- No - please go on to Q35 on the next page.
- Not sure - please go on to Q32 below.
- I don't want to answer this question - please go on to Q35 on the next page.

## teenAID - Support for injury or first aid situation

**This page contains questions about the support you have received for your injury or problem.**

32. Did you receive any first aid for this emergency or injury?

- Yes - please go on to Q33 below.
- No - please go on to Q35 on the next page.
- Not sure - please go on to Q33 below.

## teenAID: help you have received

**This page asks about who provided help to you for this emergency or injury.**

33. Who provided first aid to you?

*Please note: you can select more than one option.*

- Friend (if you select this option, please also answer Q34 on the next page)
- Parent
- Other family member
- Medical or health professional (e.g., a GP, hospital staff, or physiotherapist)
- Teacher

Other (please specify)

## teenAID: help you have received

**This page asks about the help you received from your friend.**

34. *Please answer this question only if you reported that a friend helped you in the previous question.*

Now think specifically about the help that *your friend* provided.

What did your friend do to help you?

This page asks some questions about your experiences of mental health problems. Please read each question carefully and fill out any boxes when they apply.

#### DEFINITIONS

***A mental health problem is when there is a major change in a person's normal way of thinking, feeling or behaving, which interferes with the person's ability to get on with life, and does not go away quickly or lasts longer than normal emotions or reactions would be expected to. A mental health problem might involve a diagnosed mental illness, a worsening of mental health, an undiagnosed problem, or a drug or alcohol problem.***

***A mental health crisis is when a person is at increased risk of harm to themselves or to others. Crisis situations include having thoughts of suicide, engaging in self-injury, being very intoxicated with alcohol or other drugs, or experiencing bullying or abuse.***

35. In the last 12 months have you had contact with anyone about your age (i.e. between 13-18 years old) who you thought might have a mental health problem or has experienced a mental health crisis?

*Please do not report any adults you have had contact with. For this question, we are just interested in people around your age who you may have helped.*

- Yes - please go on to Q36 below.
- No - please go on to Q40 on page 14.
- Not sure - please go on to Q36 below.
- I don't want to answer this question - please go on to Q40 on page 14.

#### teenAID survey: help you have given

This page contains questions about the help you provided to the person/people about your age.

36. Please tell us *how many people about your age* you had contact with who you thought might have a mental health problem or experienced a mental health crisis:

If you have had contact with more than one person about your age who you thought might have a mental health problem or experienced a mental health crisis, please answer the following questions **about the person who you know best**. If you only had contact with one person, please answer the following questions about that person.

37. Did you offer the person any help?

- Yes - please go on to Q38 below.
- No - please go on to Q39 below.
- Not sure - please go on to Q38 below.

**This page contains questions about what you did to help the person.**

38. What did you do to help the person?

*Please note: you can select more than one option.*

- Told them what they needed to do to fix their problems.
- Invited them to hang out and do something fun with me.
- Ignored them because they were being attention-seeking.
- Let them know I didn't want to be friends with them any more if they're like this all the time.
- Avoided talking about suicide, because it might have put the idea in their head.
- Told them I had noticed something seems wrong, and I wanted to make sure they were okay.
- Suggested they tell a health professional about their problems (e.g. a counsellor, GP, or psychologist).
- Suggested they tell an adult (other than a health professional) about their problems (e.g. a parent or teacher).
- Asked them if they were thinking of suicide.
- Encouraged them to take responsibility and deal with their problems on their own.
- Listened to them talk about their problems.
- I didn't do anything.

Other (please specify):

**This page contains questions about why you may not have been able to help the person.**

39. What was the reason(s) that you were not able to help the person?

## teenAID survey: your own mental health

40. In the last 12 months have **you** had a mental health problem or experienced a mental health crisis?  
*Please report any mental health problem you think you might have experienced, whether or not it has been formally diagnosed by a doctor or other mental health professional.*

- Yes - please go on to Q41 below.
- No - please go on to Q44 on the next page.
- Not sure - please go on to Q41 below.
- I don't want to answer this question - please go on to Q44 on the next page.

## teenAID - Support for mental health problem

**This page contains questions about the support you have received for your mental health problem.**

41. In the last 12 months has anyone tried to support or assist you with this mental health problem or crisis?

- Yes - please go on to Q42 below.
- No - please go on to Q44 on the next page.
- Not sure - please go on to Q42 below.

## teenAID: help you have received

**This page contains questions about the person who helped you.**

42. Who provided support or assistance for the problem?

*Please note: you can select more than one option.*

- Friend (if you select this option, please also answer Q43 on the next page)
- Parent
- Other family member
- Health professional (e.g. a counsellor, GP or psychologist)
- Teacher

Other (please specify)



## teenAID: help you have received

**This page asks about the help you received from your friend.**

43. Please only answer this question if you reported that a friend helped you in the previous question.

Now think specifically about the help that *your friend* provided.

What did your friend do to help you?

*Please note: you can select more than one option.*

- Told me they had noticed something seems wrong, and wanted to make sure I was okay.
- Ignored me because they thought I was being attention-seeking.
- Asked me if I was thinking of suicide.
- Listened to me talk about my problems.
- Told me what I needed to do to fix my problems.
- Suggested I tell a health professional about my problems (e.g. a counsellor, GP, or psychologist).
- Suggested I tell an adult (other than a health professional) about my problems (e.g. a parent or teacher).
- Encouraged me to take responsibility and deal with my problems alone.
- Invited me to hang out and do something fun with them.
- Let me know they didn't want to be friends with me any more if I'm like this all the time.

Other (please specify):

## teenAID - How you are feeling

**This section contains questions about how you have been feeling. Please answer as truthfully as possible.**

#### 44. In the past 30 days...

|                                                                            | None<br>of the time   | A little<br>of the time | Some<br>of the time   | Most<br>of the time   | All<br>of the time    |
|----------------------------------------------------------------------------|-----------------------|-------------------------|-----------------------|-----------------------|-----------------------|
| About how often did you feel nervous?                                      | <input type="radio"/> | <input type="radio"/>   | <input type="radio"/> | <input type="radio"/> | <input type="radio"/> |
| About how often did you feel hopeless?                                     | <input type="radio"/> | <input type="radio"/>   | <input type="radio"/> | <input type="radio"/> | <input type="radio"/> |
| About how often did you feel restless or fidgety?                          | <input type="radio"/> | <input type="radio"/>   | <input type="radio"/> | <input type="radio"/> | <input type="radio"/> |
| About how often did you feel so depressed that nothing could cheer you up? | <input type="radio"/> | <input type="radio"/>   | <input type="radio"/> | <input type="radio"/> | <input type="radio"/> |
| About how often did you feel that everything is an effort?                 | <input type="radio"/> | <input type="radio"/>   | <input type="radio"/> | <input type="radio"/> | <input type="radio"/> |
| About how often did you feel worthless?                                    | <input type="radio"/> | <input type="radio"/>   | <input type="radio"/> | <input type="radio"/> | <input type="radio"/> |

## End Survey

### That is the end of the survey. Thank you for your contribution!

If you are feeling distressed at any stage and would like some support, please try talking to your school welfare coordinator. Alternatively, you could try talking to your home room teacher or parents.

You could also try one of the following free services:

Kids Helpline: Phone 1800 55 1800 or visit [kidshelp.com.au](http://kidshelp.com.au)

Lifeline: Phone 13 11 14 or visit [lifeline.org.au](http://lifeline.org.au)

ReachOut: Visit [au.reachout.com](http://au.reachout.com)

If you would like further information about this research, please contact

Ms. Alyssia Rossetto

email: [alyssia.rossetto@unimelb.edu.au](mailto:alyssia.rossetto@unimelb.edu.au), phone: 03 9035 6029

Population Mental Health Group, University of Melbourne

Alyssia is the Research Assistant for the teenAID evaluation project.

If you have questions about the first aid training or first aid instructors, please contact the Research Assistant, Ms. Alyssia Rossetto, who can forward on your query to Australian Red Cross.

Laura Hart is the Chief Investigator of the teenAID evaluation project, and is responsible for the design and conduct of the trial.

email: [lhart@unimelb.edu.au](mailto:lhart@unimelb.edu.au)

Centre for Mental Health, University of Melbourne

If you have questions about the scientific aspects of the study, please contact:

Professor Tony Jorm

email: [ajorm@unimelb.edu.au](mailto:ajorm@unimelb.edu.au), phone: 03 9035 7799

Centre for Mental Health, University of Melbourne

Tony is a Professorial Fellow and Scientific Director of MHFAustralia.

This research has been approved by the University of Melbourne Human Research Ethics Committee.

If you have concerns about the ethics of the study, please contact:

Manager, Human Research Ethics, The University of Melbourne

phone: 03 8344 2073

Ethics approval number: 1341238.3

Version 2 May 2014
